# Supplementary material for: Niosomes encapsulated in biohydrogels for tunable delivery of phytoalexin resveratrol
Source: PubMed Central journal article supplement (PMC9061210; doi:10.1039/c8ra09655d), 2019-03-08
Supplement: RA-009-C8RA09655D-s001.pdf [file RA-009-C8RA09655D-s001.pdf]

## ***Supporting Information***

### **Niosomes encapsulated in biohydrogels for tunable delivery of phytoalexin resveratrol**

Noelia D. Machado,<sup>a,b</sup> Mariana A. Fernández,<sup>a</sup> Marleen Haering,<sup>b</sup> César Saldías<sup>c</sup> and David Díaz Díaz<sup>b,d\*</sup>

<sup>a</sup>Instituto de Investigaciones en Físico-Química de Córdoba (INFIQC-CONICET), Departamento de Química Orgánica, Facultad de Ciencias Químicas, Universidad Nacional de Córdoba, Ciudad Universitaria, X5000HUA, Córdoba (Argentina). <sup>b</sup>Institute of Organic Chemistry, University of Regensburg, Universitätsstrasse. 31, 93040 Regensburg (Germany). <sup>c</sup>Departamento de Química Física, Facultad de Química, Pontificia Universidad Católica de Chile, Macul, Santiago (Chile). <sup>d</sup>Instituto de Productos Naturales y Agrobiología del CSIC, Avda. Astrofísico Francisco Sánchez 3, 38206 La Laguna, Tenerife (Spain).

E-mail: David.Diaz@chemie.uni-regensburg.de; d.diaz.diaz@ipna.csic.es

**LIST OF CONTENTS**

|                                                       | <i>Page</i> |
|-------------------------------------------------------|-------------|
| 1. Digital pictures of representative hydrogels ..... | S3          |
| 2. Additional rheological plots .....                 | S4          |
| 3. Stability of the niosomes in the hydrogels.....    | S6          |
| 4. Standard curves for RSV .....                      | S7          |
| 5. Model release parameters and fitting curves .....  | S8          |
| 6. Photoisomerization experiments .....               | S34         |

### 1. Digital pictures of representative hydrogels

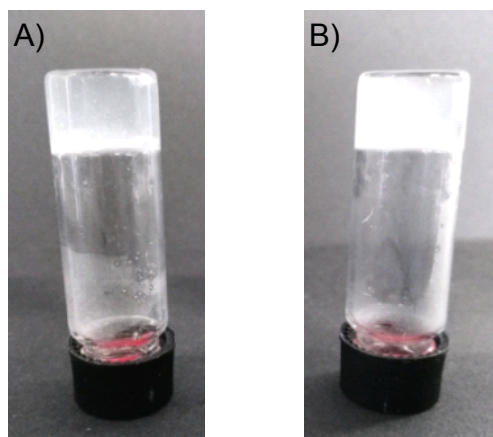

**Figure S1.** Representative hydrogel pictures: A)  $\kappa$ -C:gelatin (1:1 mass ratio, 4 % w/v). B)  $\kappa$ -C:gelatin (1:1 mass ratio, 4 % w/v) containing RSV-niosomes.

## 2. Additional rheological plots

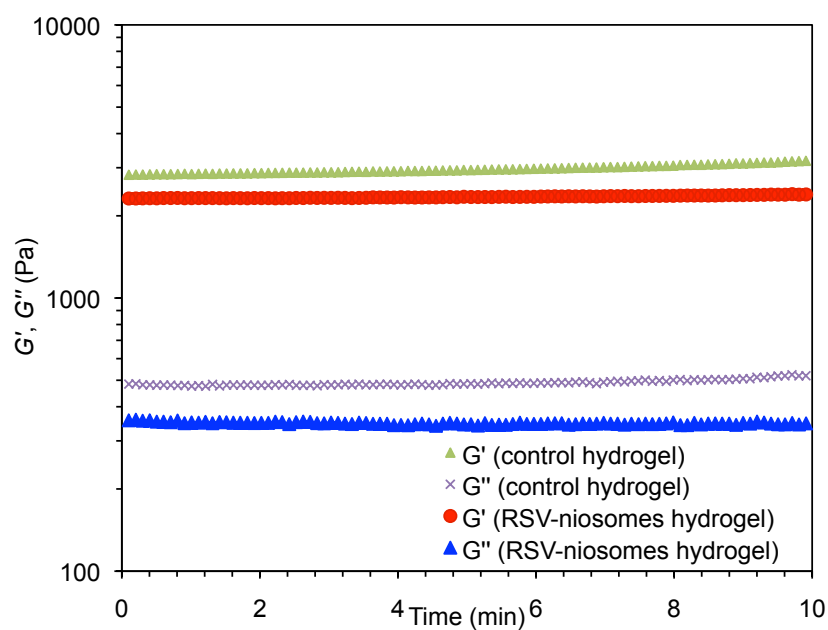

**Figure S2.** DTS measurements of native hydrogel (control hydrogel without niosomes) and hydrogel containing RSV-niosomes.

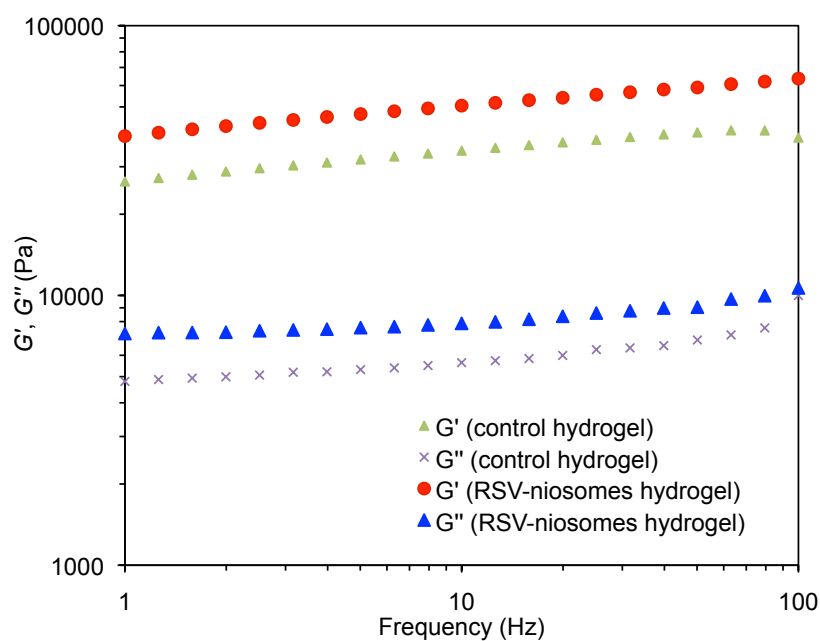

**Figure S3.** DFS measurements at pH 1.2 of native hydrogel (control hydrogel without niosomes) and hydrogel containing RSV-niosomes.

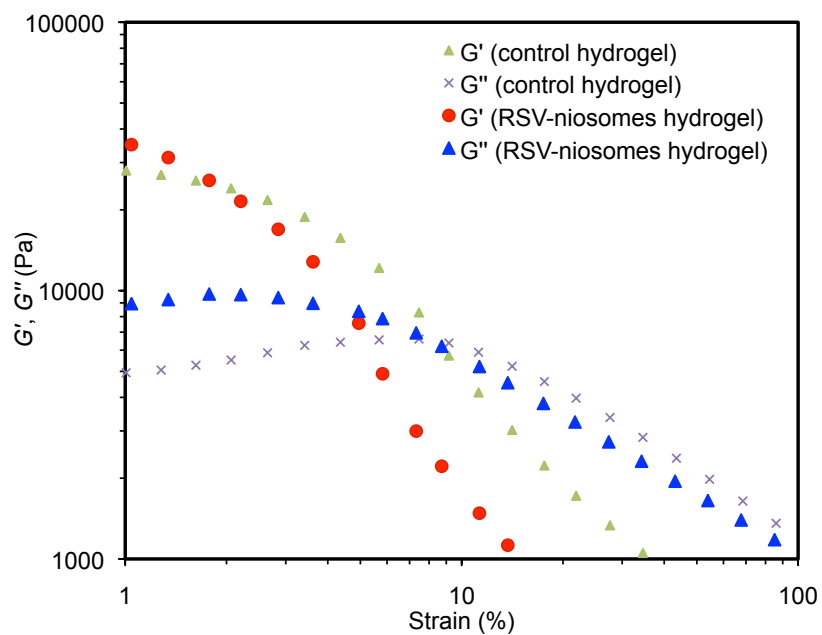

**Figure S4.** DSS measurements at pH 1.2 of native hydrogel (control hydrogel without niosomes) and hydrogel containing RSV-niosomes.

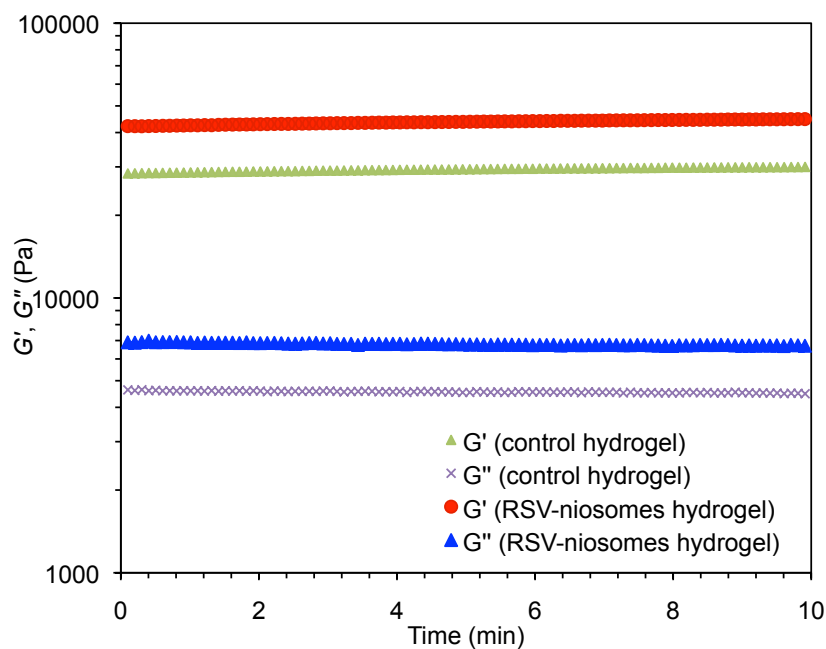

**Figure S5.** DTS measurements at pH 1.2 of native hydrogel (control hydrogel without niosomes) and hydrogel containing RSV-niosomes.

### 3. Stability of the niosomes in the hydrogels

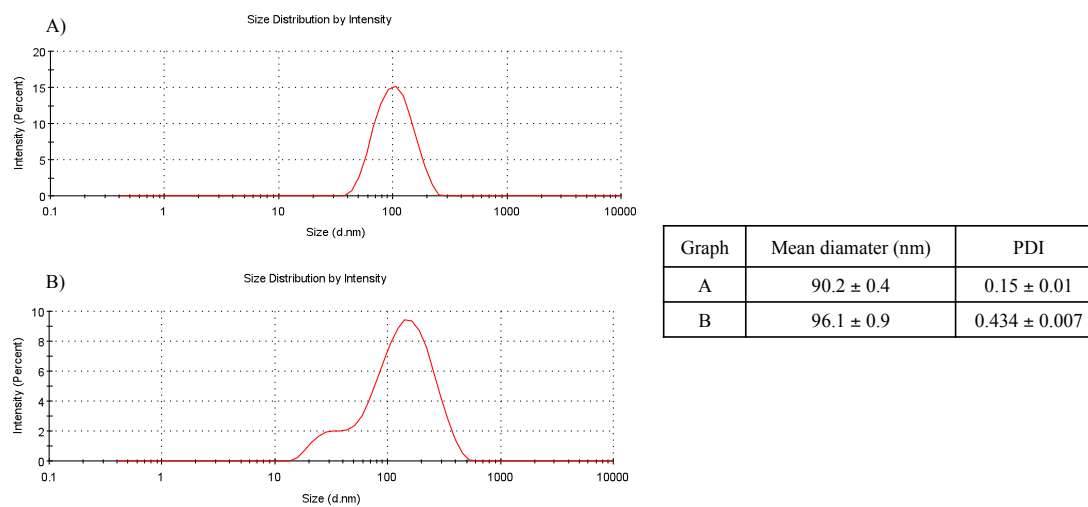

**Figure S6.** Mean diameter of RSV-niosomes A) incubated at 37 °C for 24 h and B) after hydrogel degradation.

#### 4. Standard curves for RSV

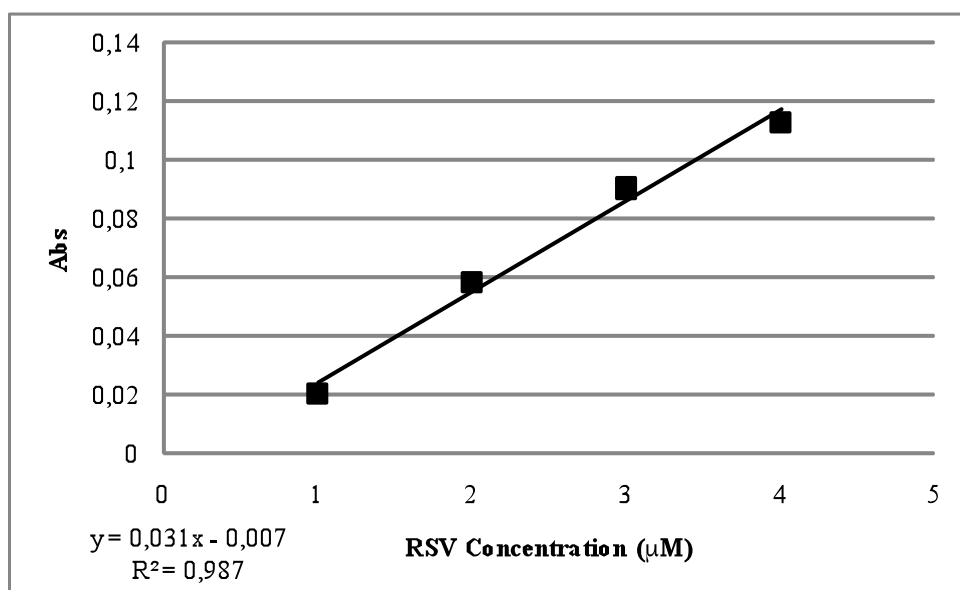

**Figure S7.** Standard curve of RSV in water using UV-visible spectrophotometry ( $\lambda_{\text{m\acute{a}x}} = 310 \text{ nm}$ , cuvette path length 1 cm).

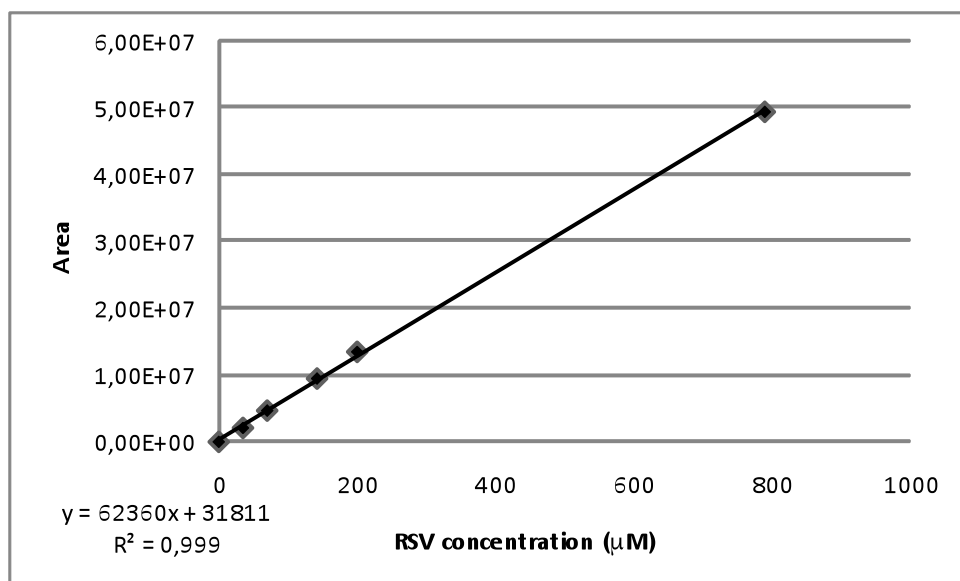

**Figure S8.** Standard curve of RSV using HPLC.

## 5. Model release parameters

**Table S1.** Model release parameters for *hydrogels κ-C:gelatin 4 % w/v* at pH 1.2, according to different mathematical models.

| Mathematical model | $k$                                        | $r^2$ |
|--------------------|--------------------------------------------|-------|
| First order        | -0.0535                                    | 0.992 |
| Higuchi            | 0.21                                       | 0.968 |
| Korsmeyer-Peppas   | 2.85 (n= 0.7)                              | 0.986 |
| Weibull            | $-2.94 \times 10^{24}$ (a= 0.002, b= 0.05) | 0.985 |

**Table S2.** Model release parameters for *hydrogels κ-C:gelatin 3 % w/v* at pH 1.2 according to different mathematical models.

| Mathematical model | $k$                                        | $r^2$ |
|--------------------|--------------------------------------------|-------|
| First order        | -0.7189                                    | 0.997 |
| Higuchi            | 0.28                                       | 0.989 |
| Korsmeyer-Peppas   | 3.22 (n= 0.60)                             | 0.993 |
| Weibull            | $-2.94 \times 10^{24}$ (a= 0.005, b= 0.05) | 0.994 |

**Table S3.** Model release parameters for *hydrogels κ-C:gelatin 2 % w/v* at pH 1.2 according to different mathematical models.

| Mathematical model | $k$                                        | $r^2$ |
|--------------------|--------------------------------------------|-------|
| First order        | -1.070                                     | 0.998 |
| Higuchi            | 0.38                                       | 0.992 |
| Korsmeyer-Peppas   | 3.69 (n= 0.50)                             | 0.985 |
| Weibull            | $-2.94 \times 10^{24}$ (a= 0.013, b= 0.04) | 0.988 |

**Table S4.** Model release parameters for *hydrogels κ-C:gelatin 4 % w/v* at pH 6.8, according to different mathematical models.

| Mathematical model | $k$                                         | $r^2$ |
|--------------------|---------------------------------------------|-------|
| First order        | -0.1366                                     | 0.998 |
| Higuchi            | 0.11                                        | 0.984 |
| Korsmeyer-Peppas   | 1.06 (n= 0.65)                              | 0.998 |
| Weibull            | $-2.94 \times 10^{24}$ (a= -0.002, b= 0.05) | 0.997 |

**Table S5.** Model release parameters for *hydrogels KC:gelatin 3 % w/v* at pH 6.8 according to different mathematical models.

| Mathematical model | $k$                                         | $r^2$ |
|--------------------|---------------------------------------------|-------|
| First order        | -0.1062                                     | 0.991 |
| Higuchi            | 0.14                                        | 0.991 |
| Korsmeyer-Peppas   | 2.14 (n= 0.61)                              | 0.998 |
| Weibull            | $-2.94 \times 10^{24}$ (a= -0.019, b= 0.05) | 0.998 |



**Table S6.** Model release parameters for *hydrogels κ-C:gelatin 2 % w/v* at pH 6.8 according to different mathematical models.

| Mathematical model | $k$                                        | $r^2$ |
|--------------------|--------------------------------------------|-------|
| First order        | -0.1110                                    | 0.990 |
| Higuchi            | 0.18                                       | 0.970 |
| Korsmeyer-Peppas   | 2.21 (n= 0.72)                             | 0.986 |
| Weibull            | $-2.94 \times 10^{24}$ (a= 0.001, b= 0.05) | 0.988 |

**Table S7.** Correlation coefficients obtained by fitting the experimental data with First Order, Higuchi, Korsmeyer-Peppas and Weibull models.

| pH  | Gel formulation<br>κ-C:gelatin<br>(1:1 mass<br>ratio) w/v | Drug release mathematical models |         |                      |              |
|-----|-----------------------------------------------------------|----------------------------------|---------|----------------------|--------------|
|     |                                                           | First order                      | Higuchi | Korsmeyer-<br>Peppas | Weibull      |
| 1.2 | 2 %                                                       | <b>0.998</b>                     | 0.992   | 0.985                | 0.988        |
|     | 3 %                                                       | <b>0.997</b>                     | 0.989   | 0.993                | 0.994        |
|     | 4 %                                                       | <b>0.992</b>                     | 0.968   | 0.986                | 0.985        |
| 6.8 | 2 %                                                       | <b>0.990</b>                     | 0.970   | 0.986                | 0.988        |
|     | 3 %                                                       | 0.991                            | 0.911   | <b>0.998</b>         | <b>0.998</b> |
|     | 4 %                                                       | <b>0.998</b>                     | 0.984   | <b>0.998</b>         | 0.997        |

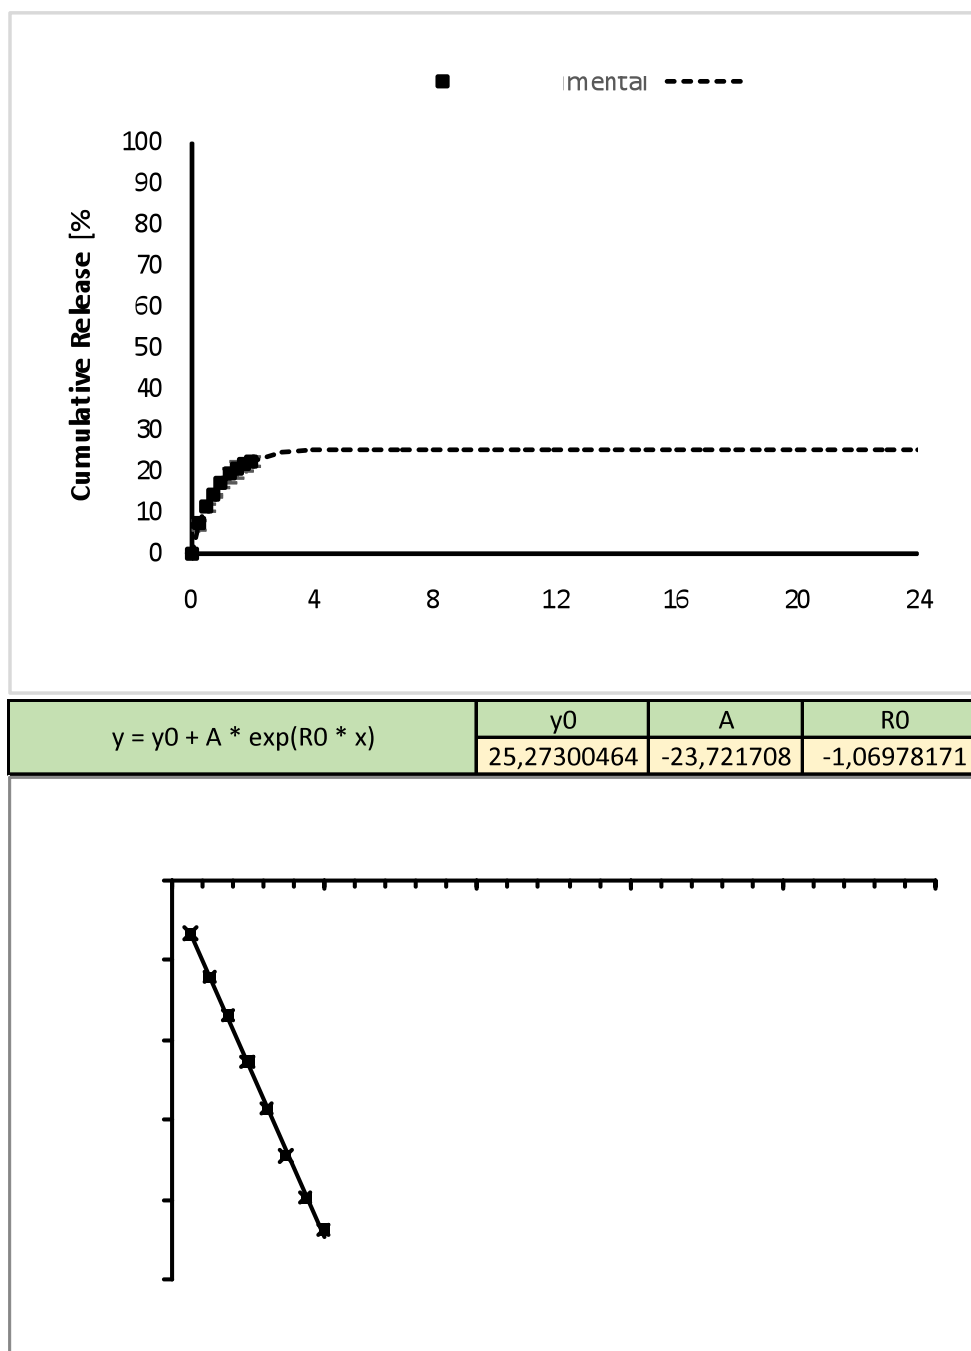

**Figure S9.** 2 % w/v  $\kappa$ -C:gelatin (1:1 mass ratio) hydrogels. First order kinetic model at pH 1.2.

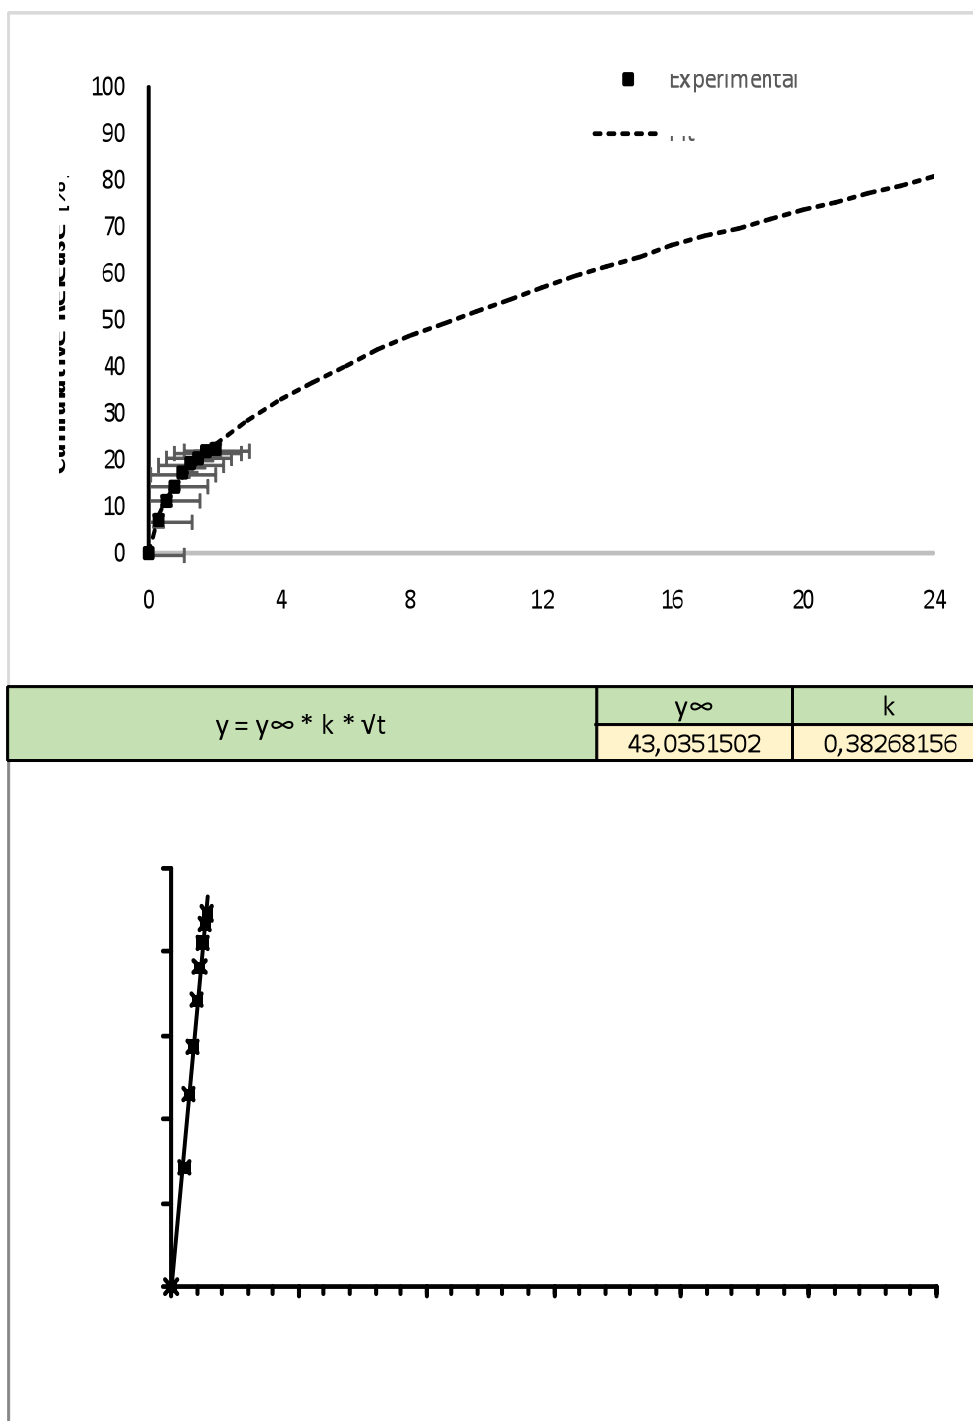

**Figure S10.** 2 % w/v  $\kappa$ -C:gelatin (1:1 mass ratio) hydrogels. Higuchi model at pH 1.2.

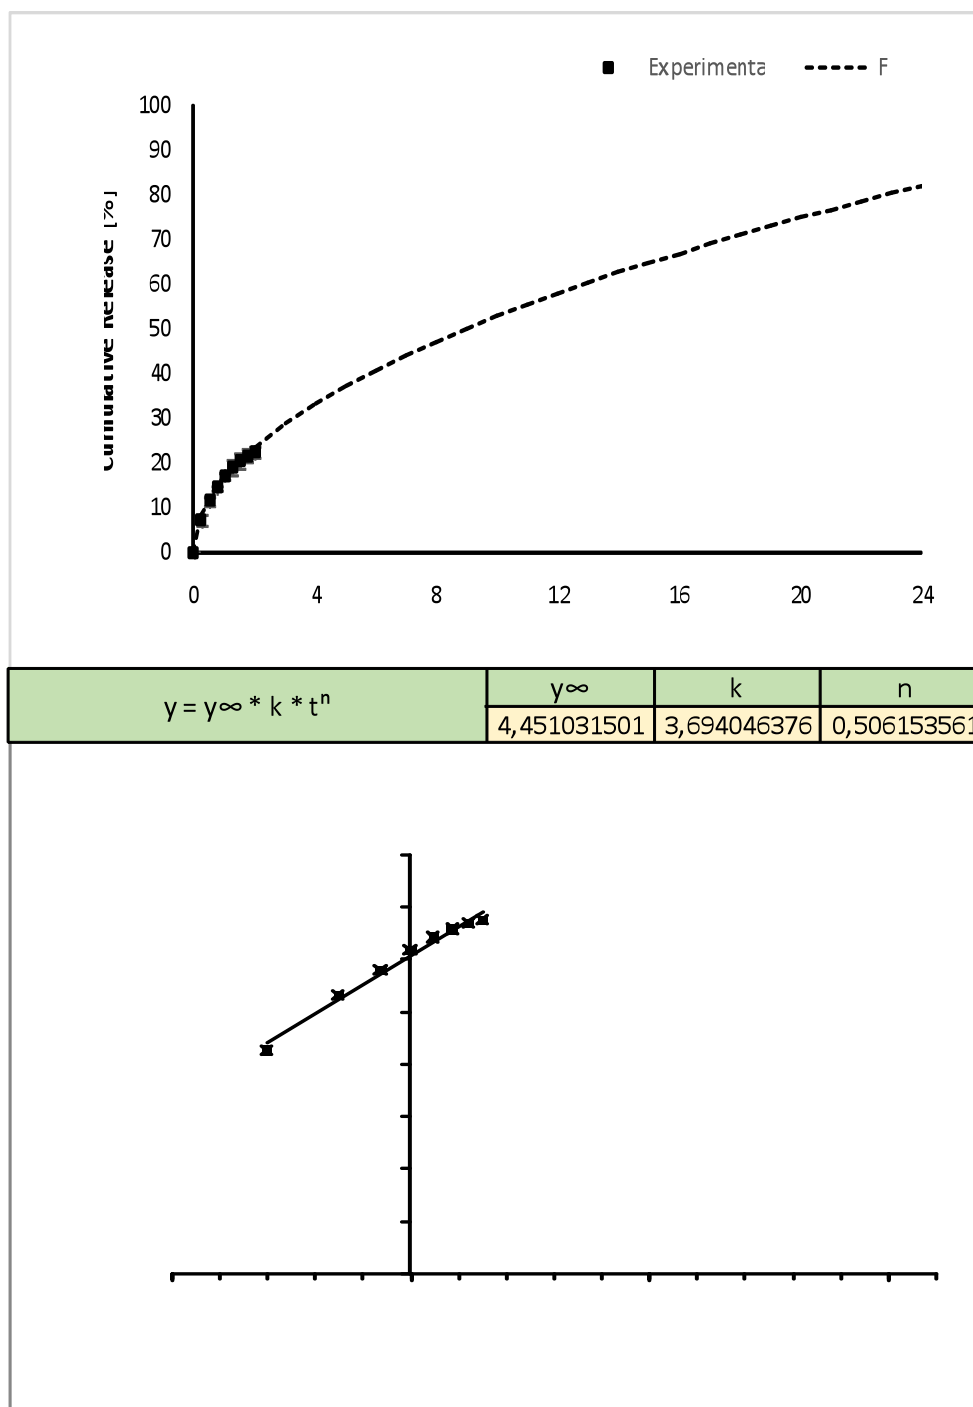

**Figure S11.** 2 % w/v  $\kappa$ -C:gelatin (1:1 mass ratio) hydrogels. Korsmeier-Peppas model at pH 1.2.

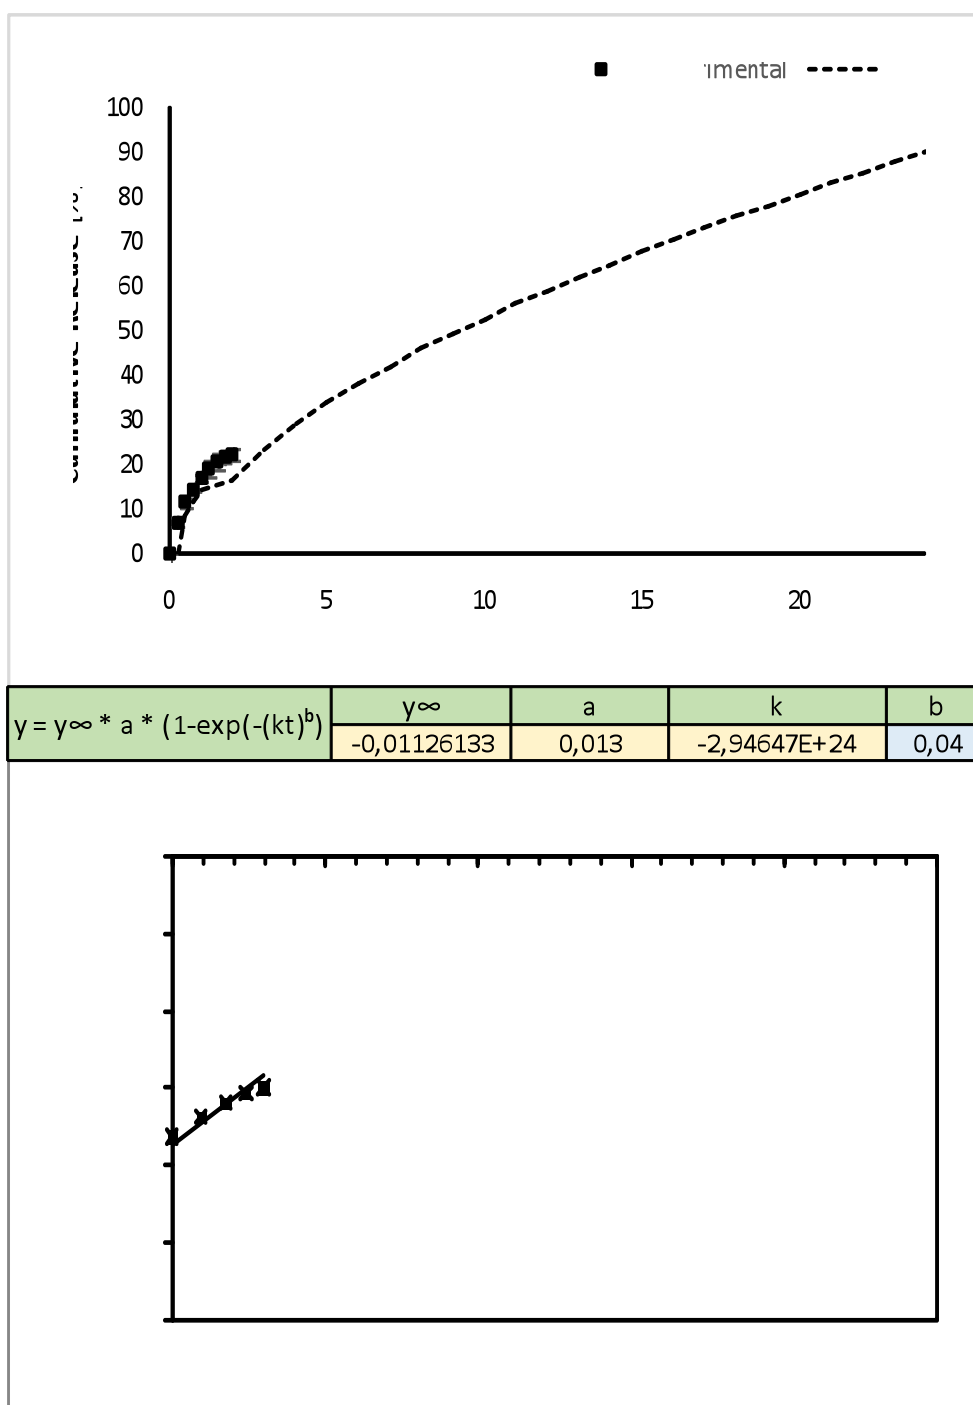

**Figure S12.** 2 % w/v  $\kappa$ -C:gelatin (1:1 mass ratio) hydrogels. Weibull model at pH 1.2.

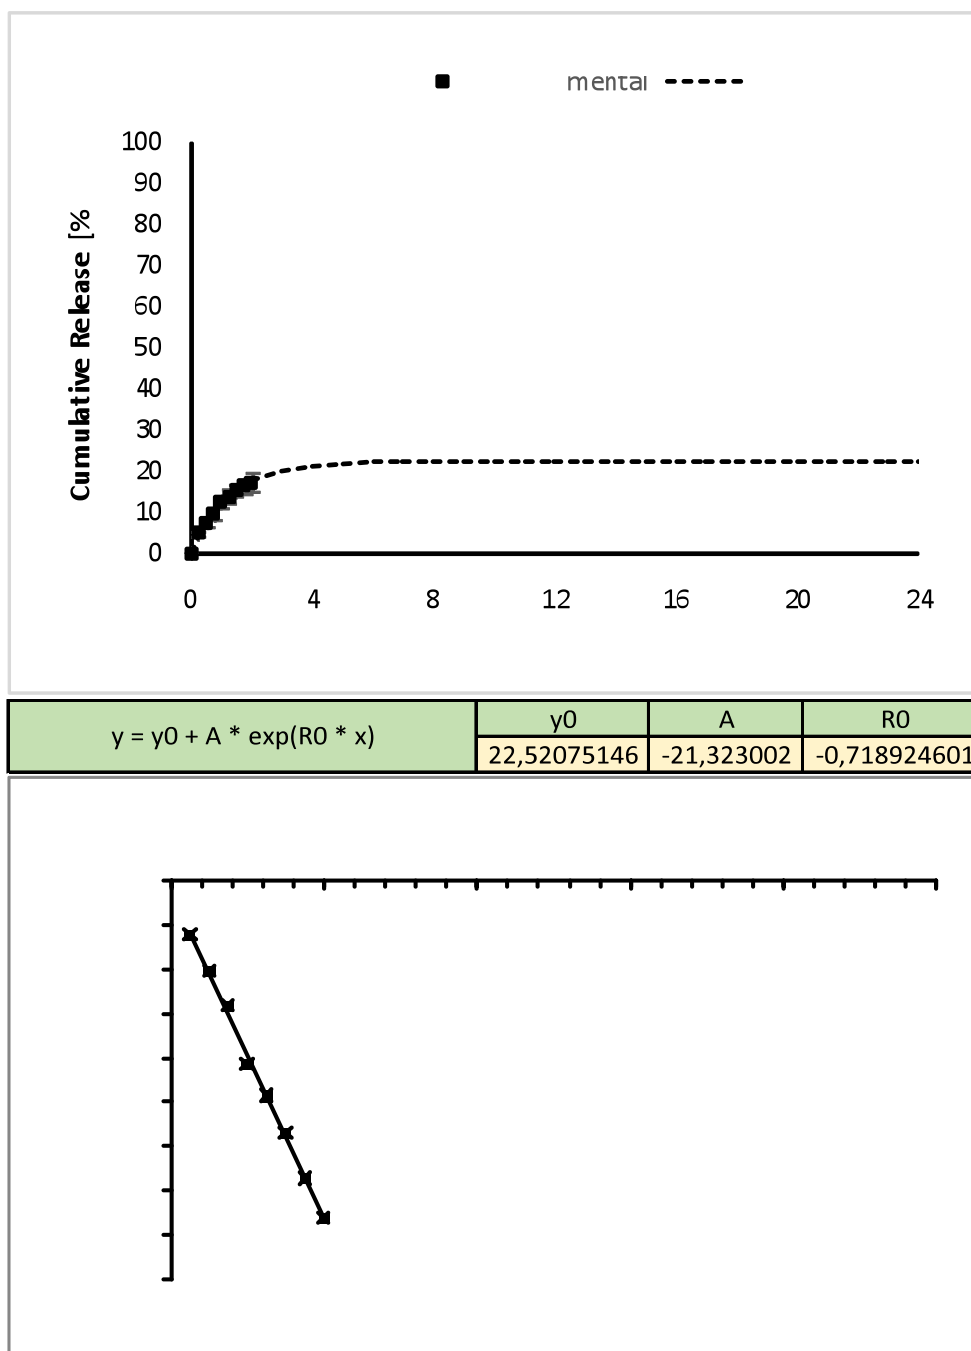

**Figure S13.** 3 % w/v  $\kappa$ -C:gelatin (1:1 mass ratio) hydrogels . First order kinetic model at pH 1.2.

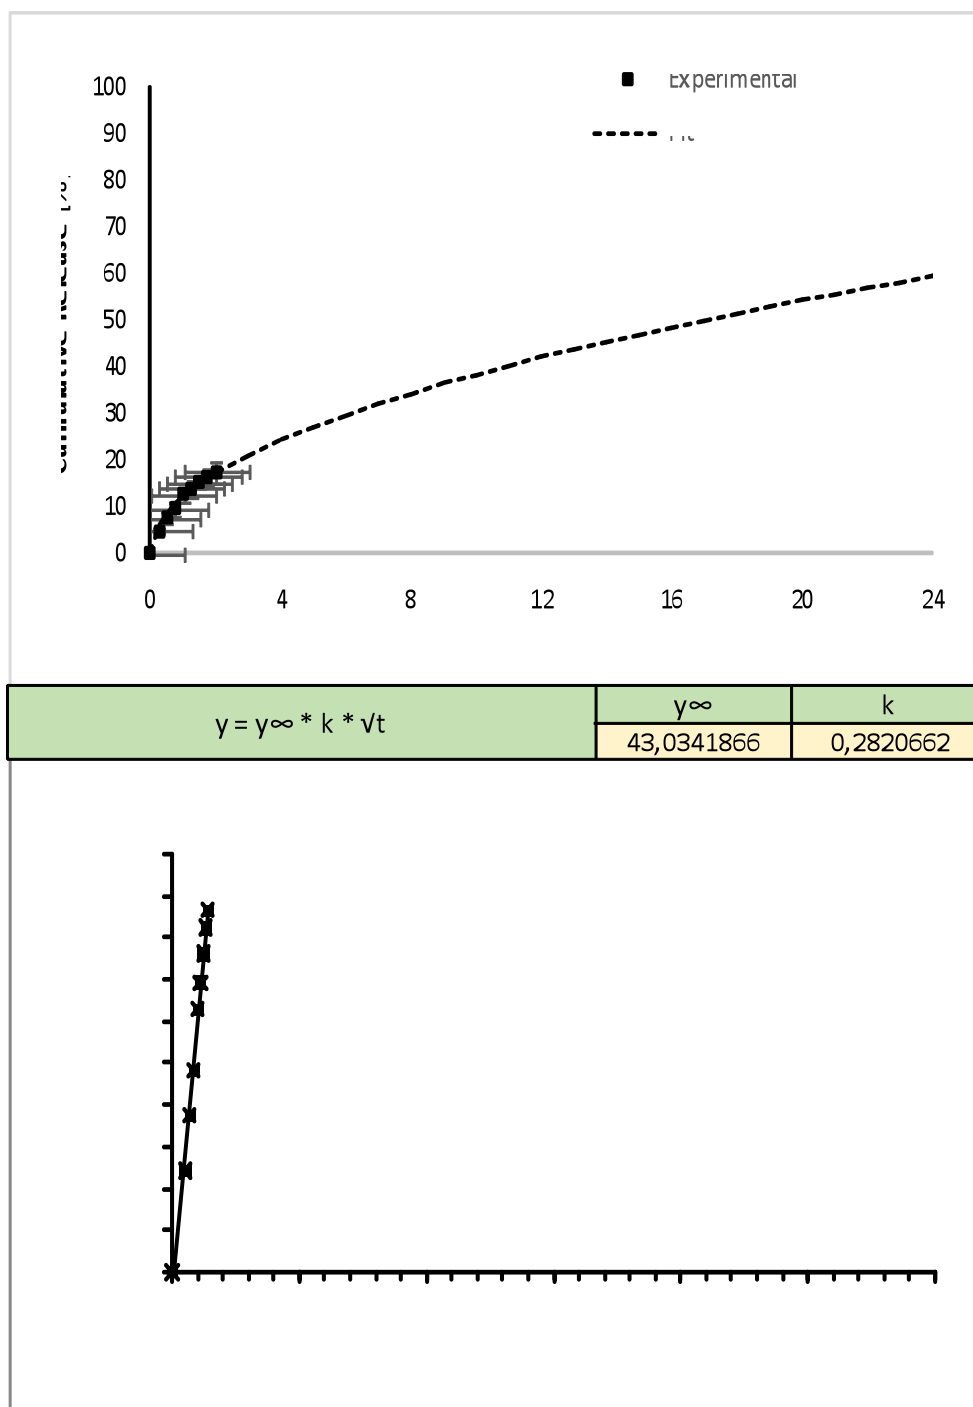

**Figure S14.** 3 % w/v  $\kappa$ -C:gelatin (1:1 mass ratio) hydrogels . Higuchi model at pH 1.2.

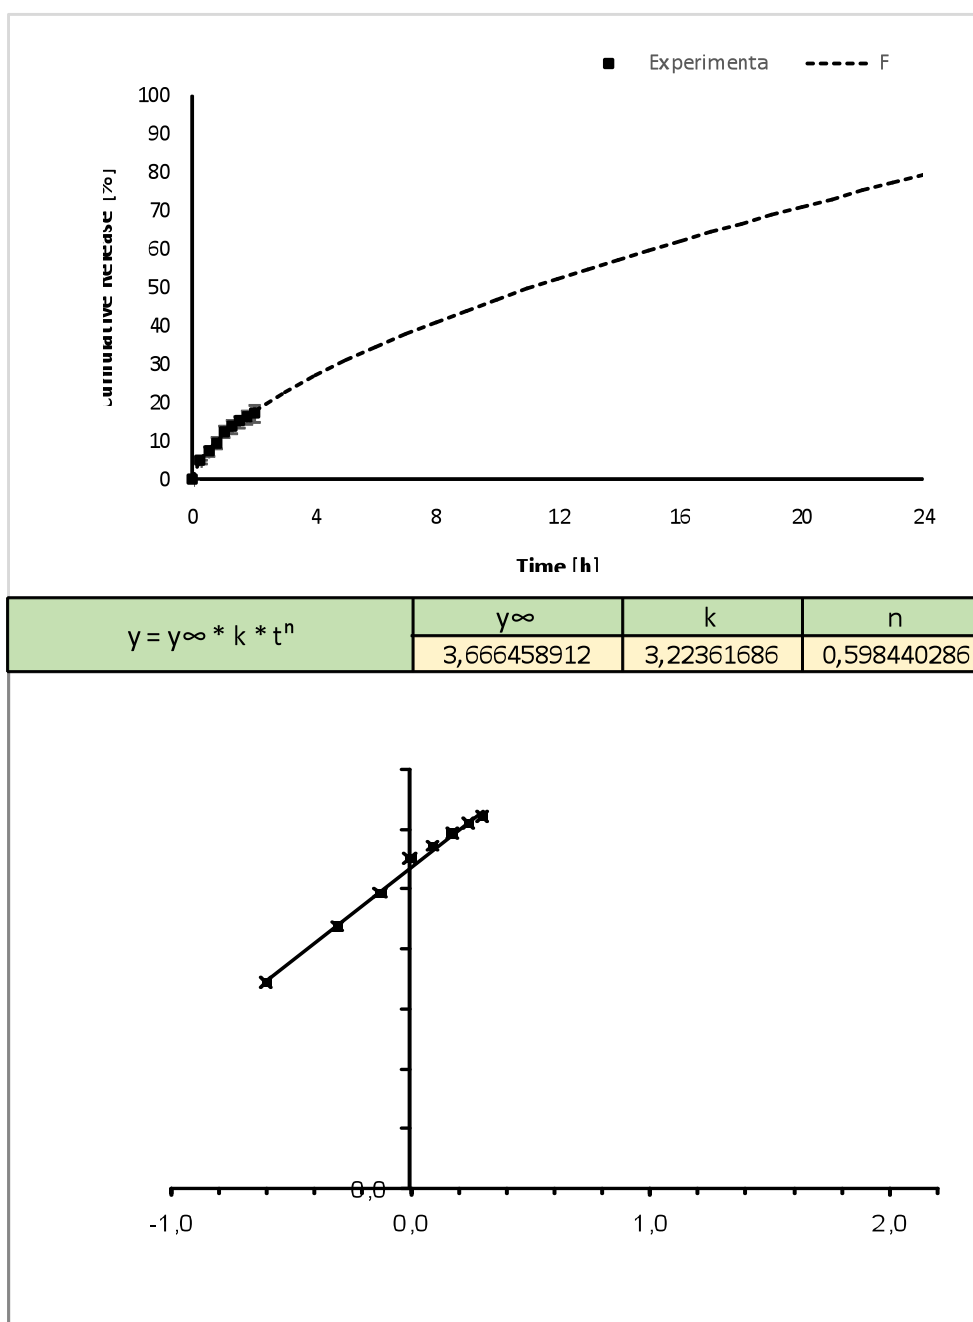

**Figure S15.** 3 % w/v  $\kappa$ -C:gelatin (1:1 mass ratio) hydrogels . Korsmeier-Peppas model at pH 1.2.



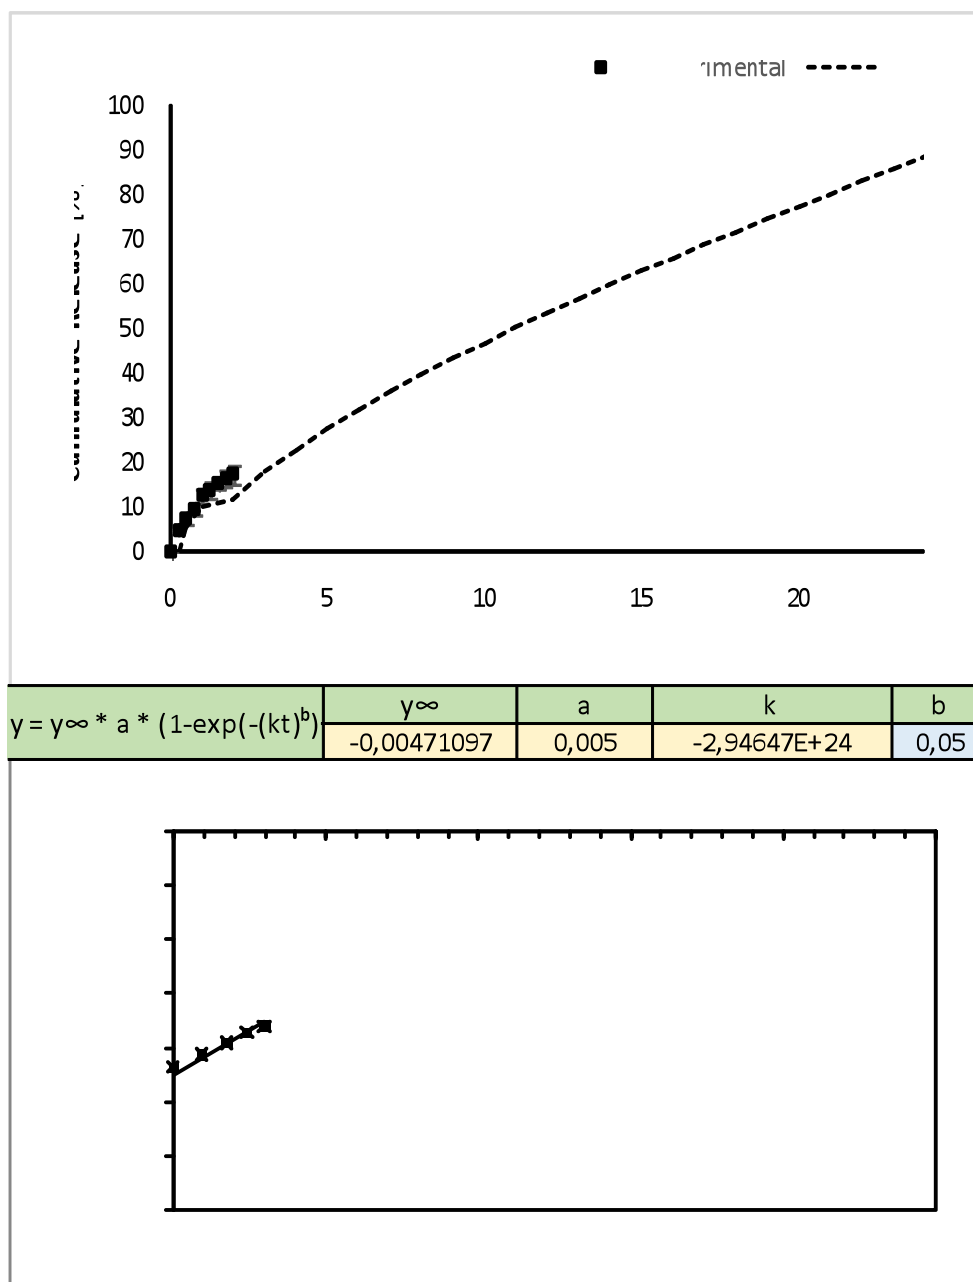

**Figure S16.** 3 % w/v  $\kappa$ -C:gelatin (1:1 mass ratio) hydrogels . Weibull model at pH 1.2.

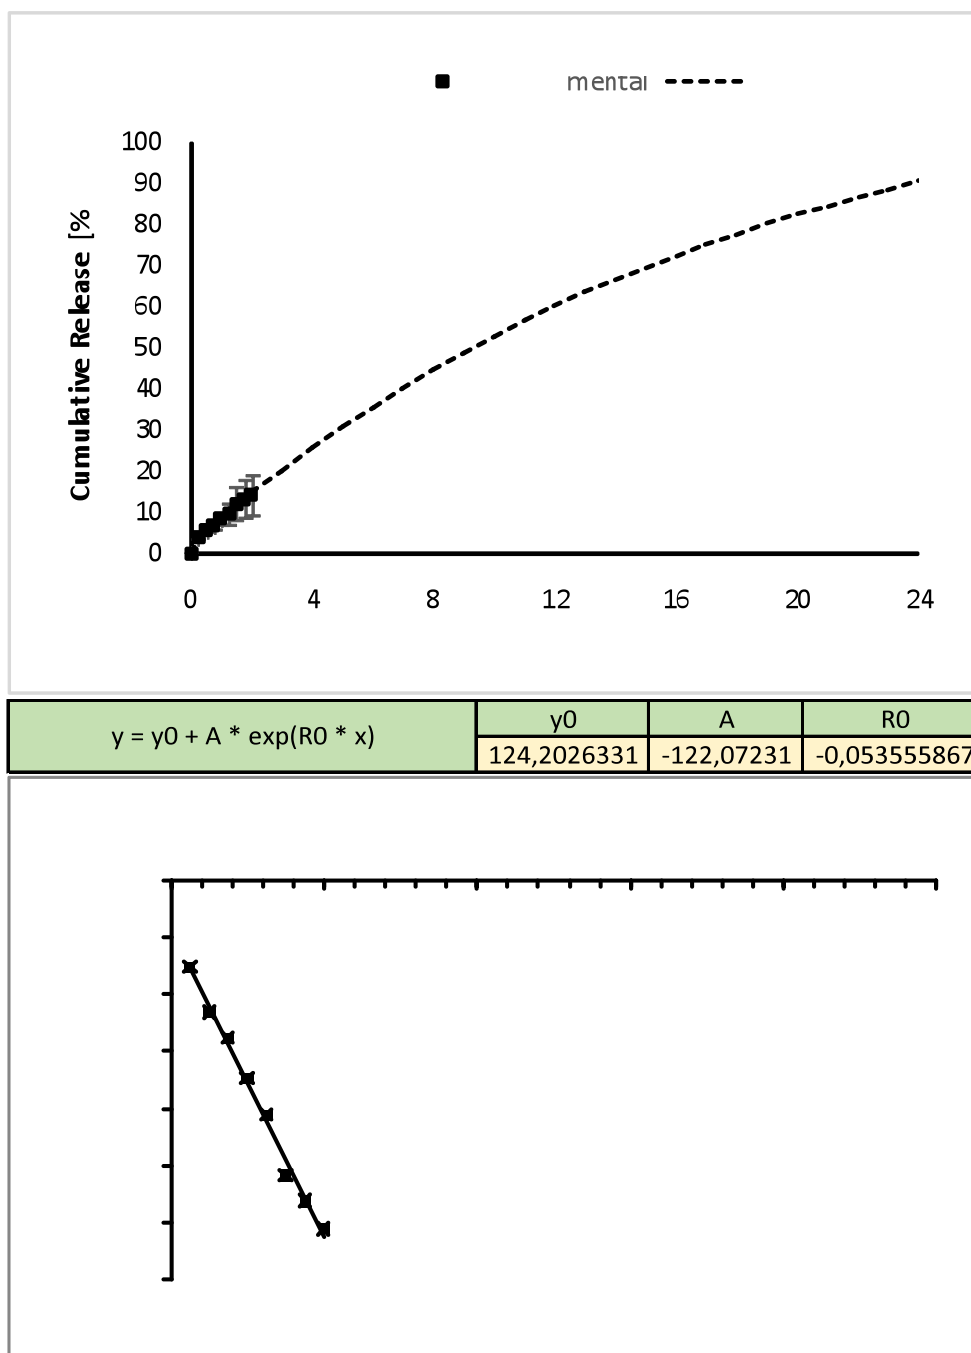

**Figure S17.** 4 % w/v  $\kappa$ -C:gelatin (1:1 mass ratio) hydrogels . First order kinetic model at pH 1.2.

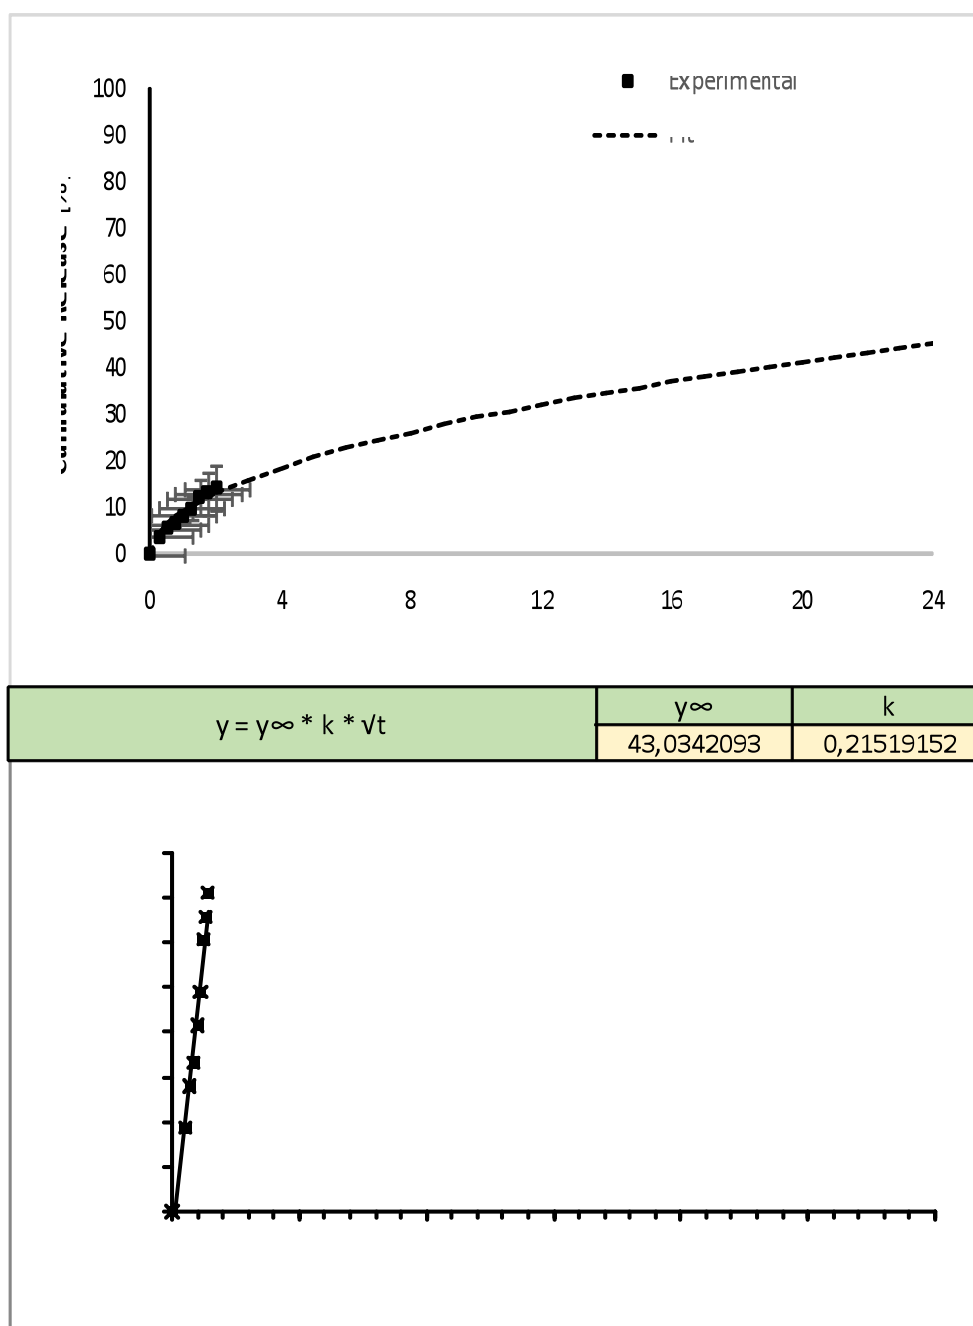

**Figure S18.** 4 % w/v  $\kappa$ -C:gelatin (1:1 mass ratio) hydrogels . Higuchi model at pH 1.2.

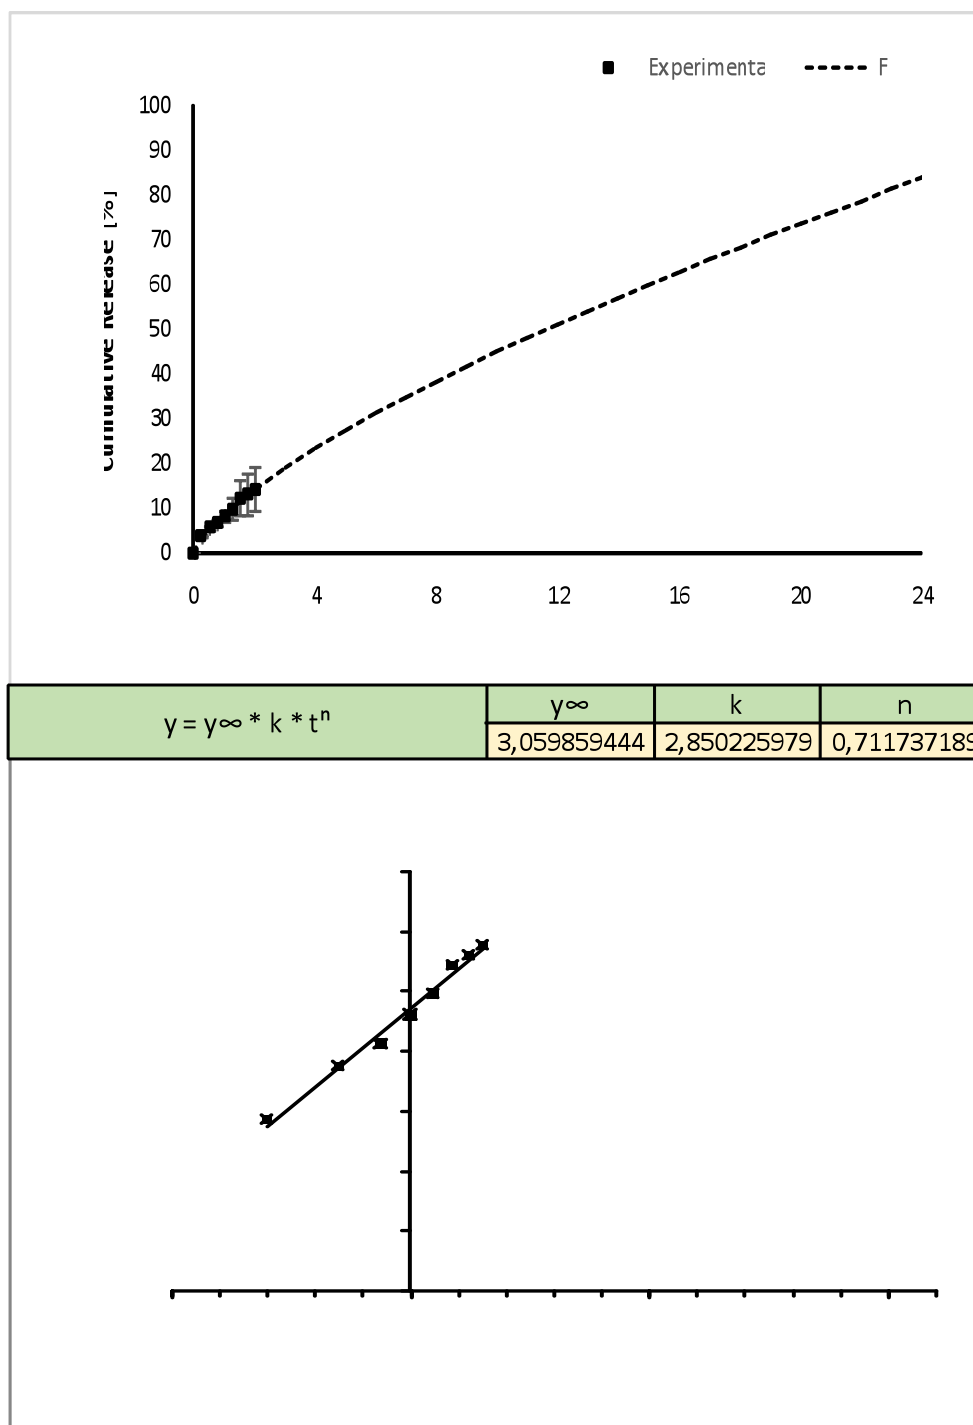

**Figure S19.** 4 % w/v  $\kappa$ -C:gelatin (1:1 mass ratio) hydrogels. Korsmeyer-Peppas model at pH 1.2.

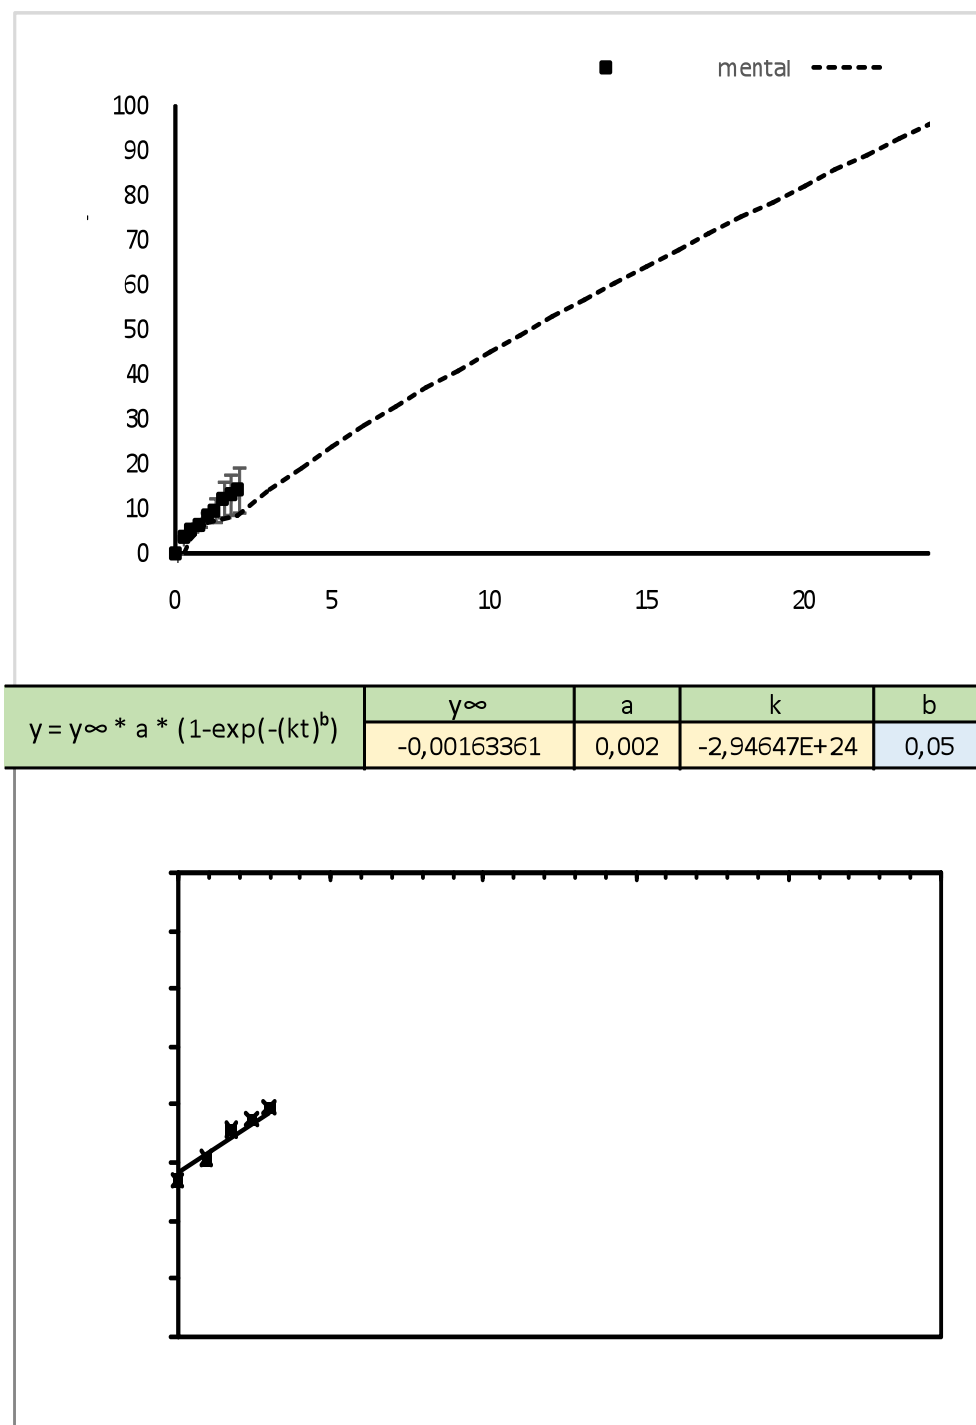

**Figure S20.** 4 % w/v  $\kappa$ -C:gelatin (1:1 mass ratio) hydrogels . Weibull model at pH 1.2.

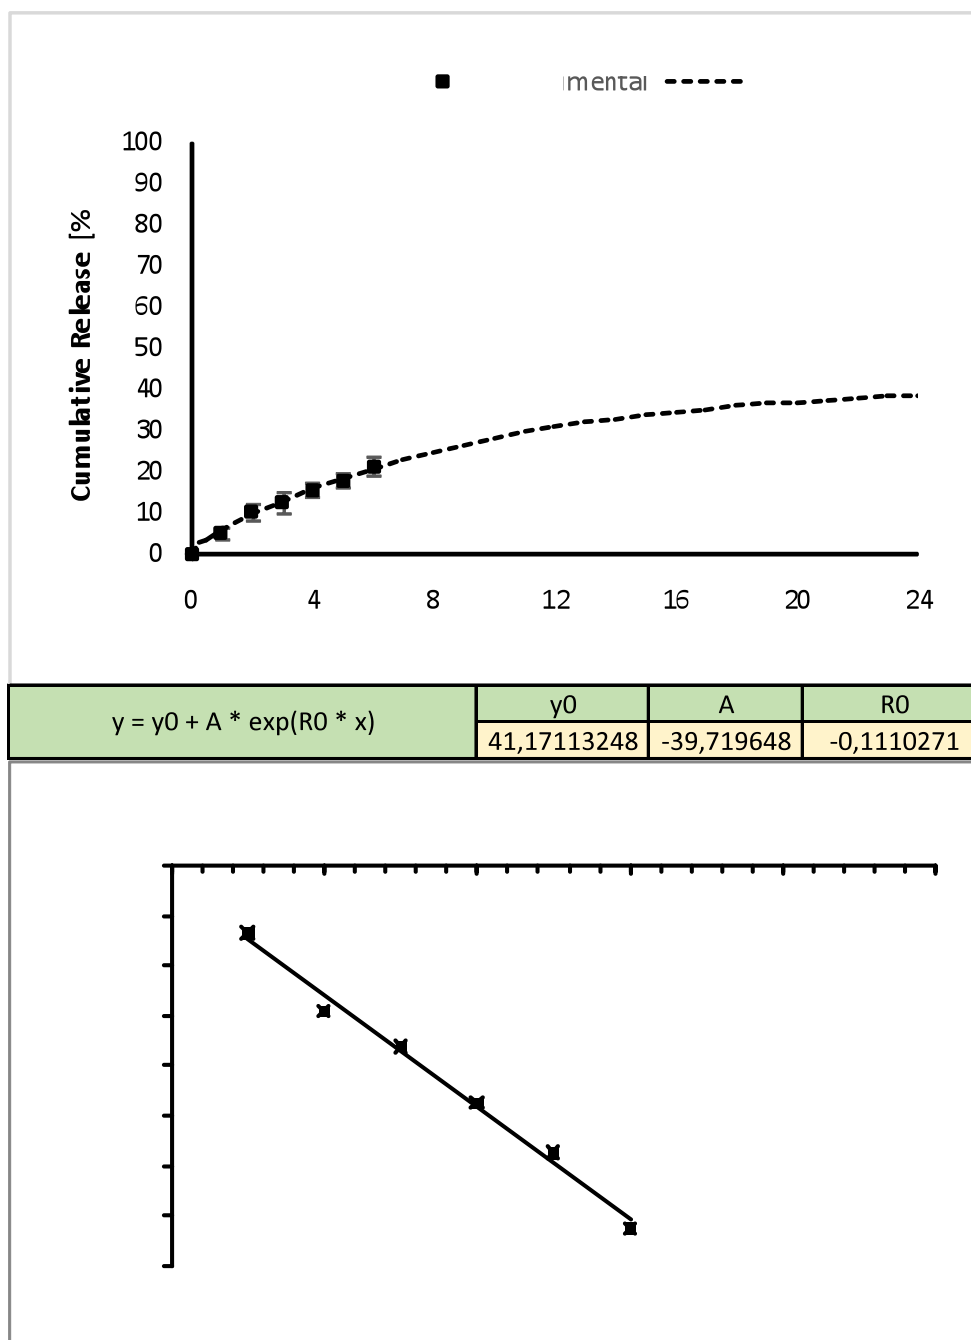

Figure S21. 2 % w/v  $\kappa$ -C:gelatin (1:1 mass ratio) hydrogels. First order kinetic model at pH 6.8.

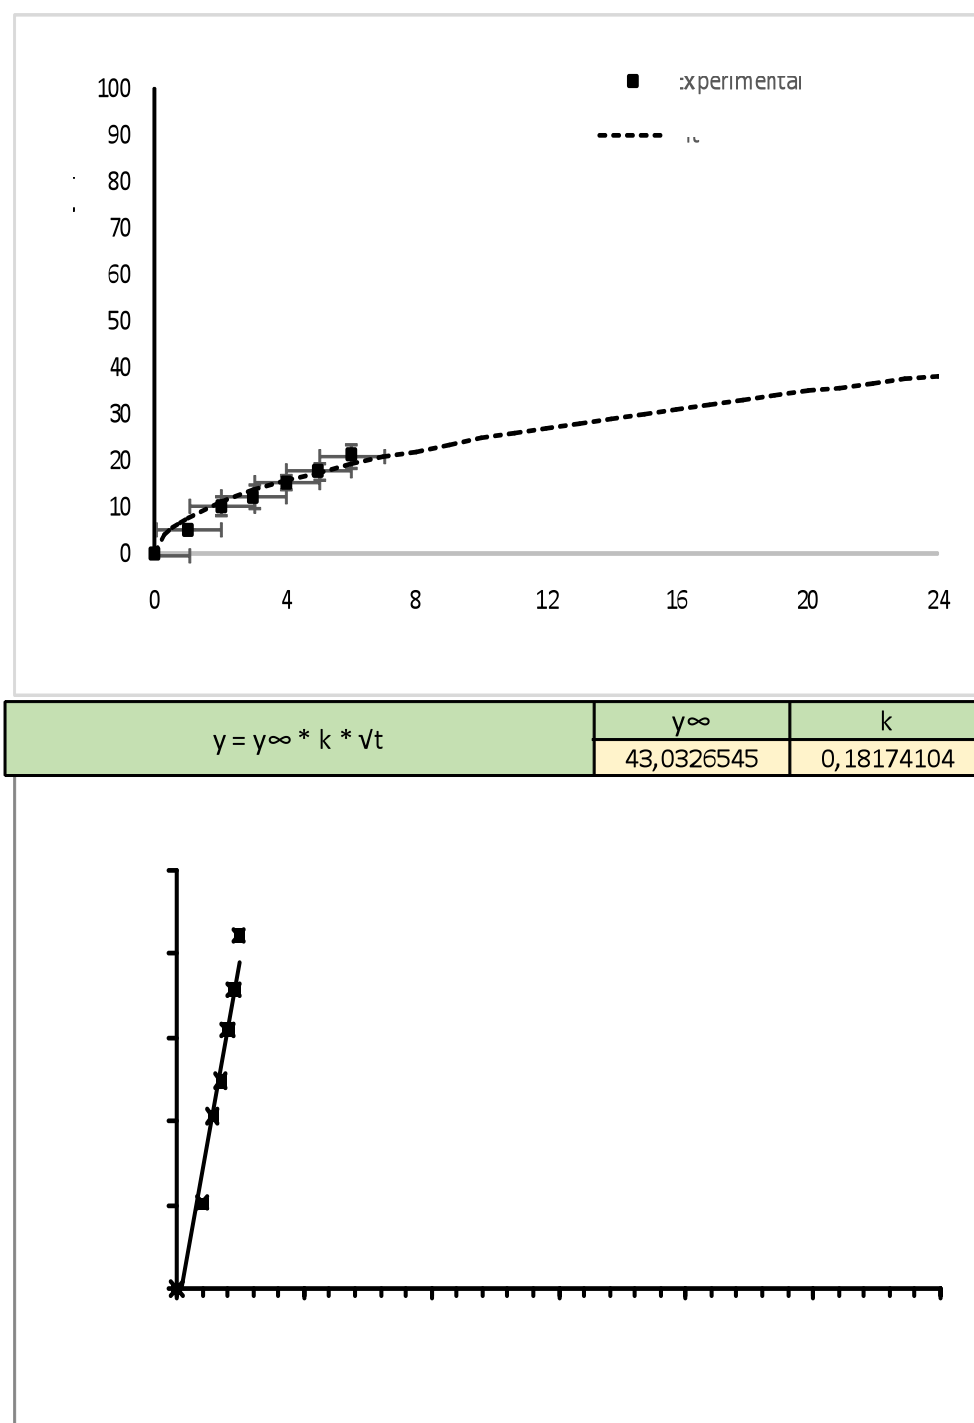

**Figure S22.** 2 % w/v  $\kappa$ -C:gelatin (1:1 mass ratio) hydrogels. Higuchi model at pH 6.8.

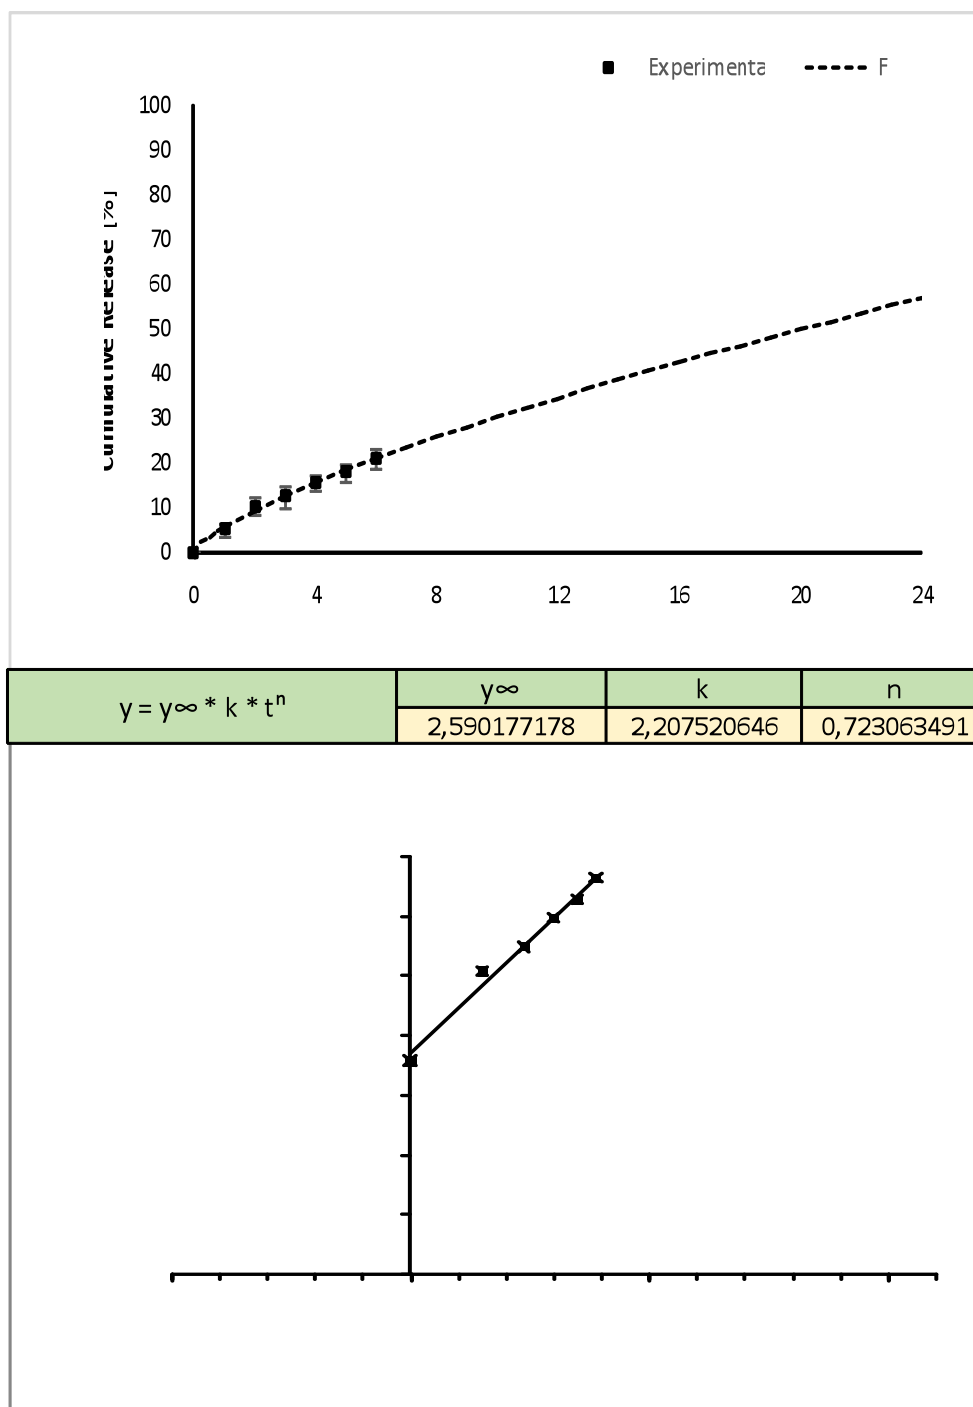

**Figure S23.** 2 % w/v  $\kappa$ -C:gelatin (1:1 mass ratio) hydrogels. Korsmeier-Peppas model at pH 6.8.



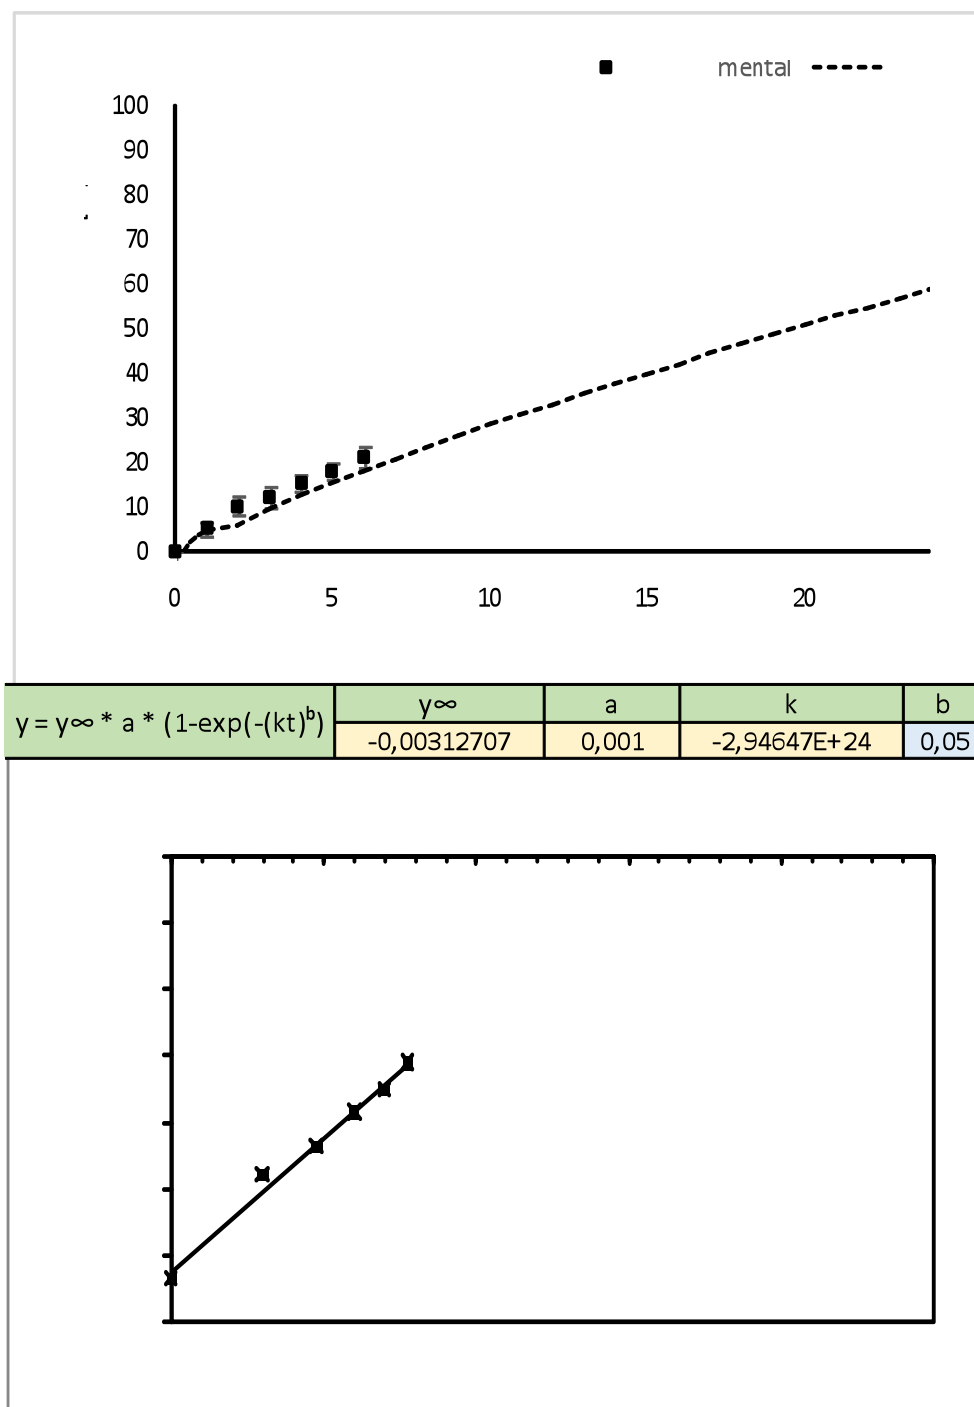

**Figure S24.** 2 % w/v  $\kappa$ -C:gelatin (1:1 mass ratio) hydrogels. Weibull model at pH 6.8.

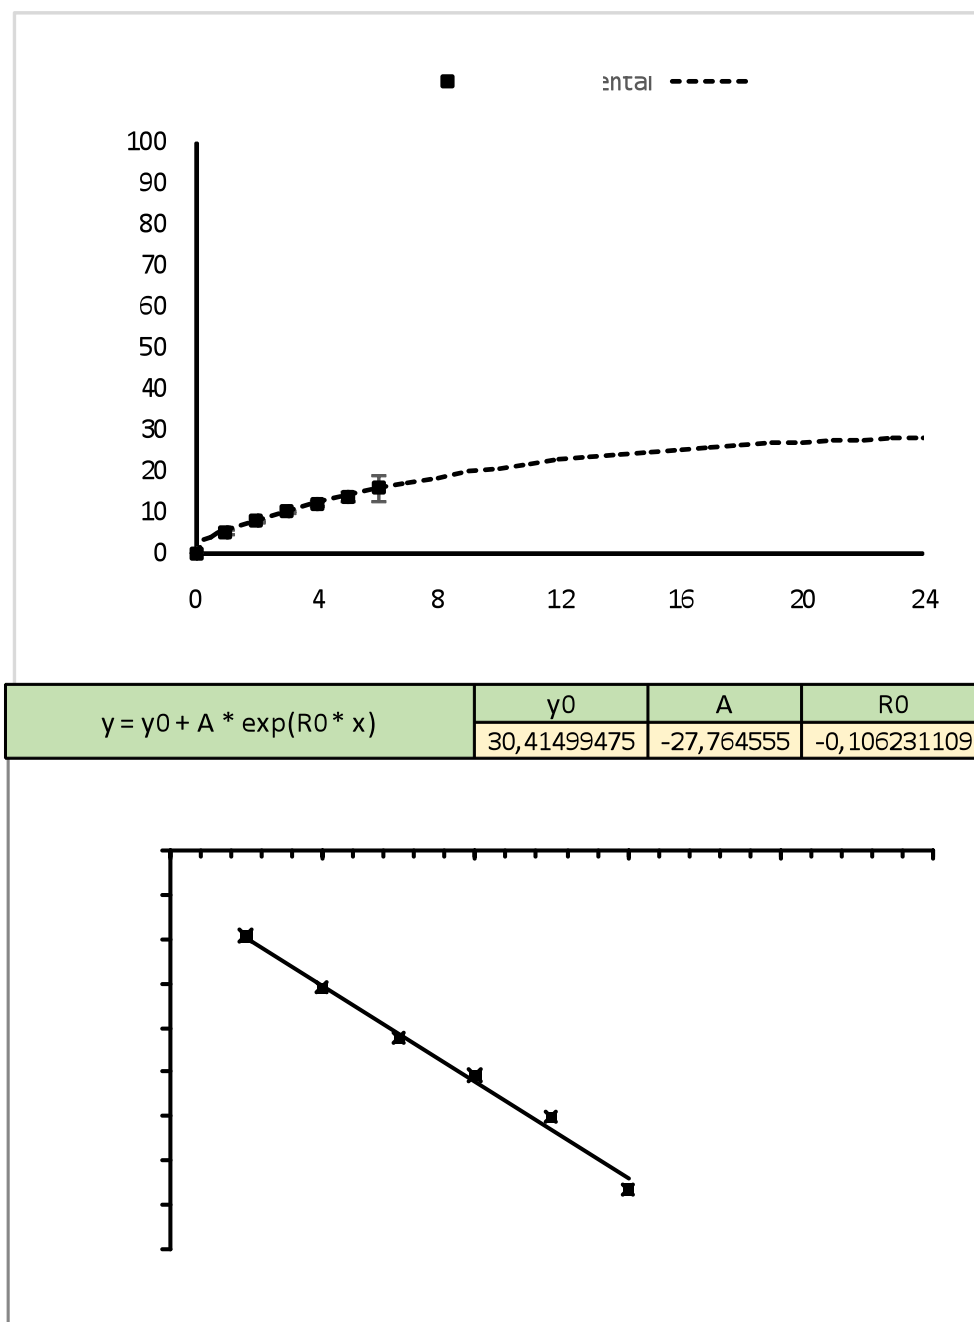

**Figure S25.** 3 % w/v  $\kappa$ -C:gelatin (1:1 mass ratio) hydrogels . First order kinetic model at pH 6.8.

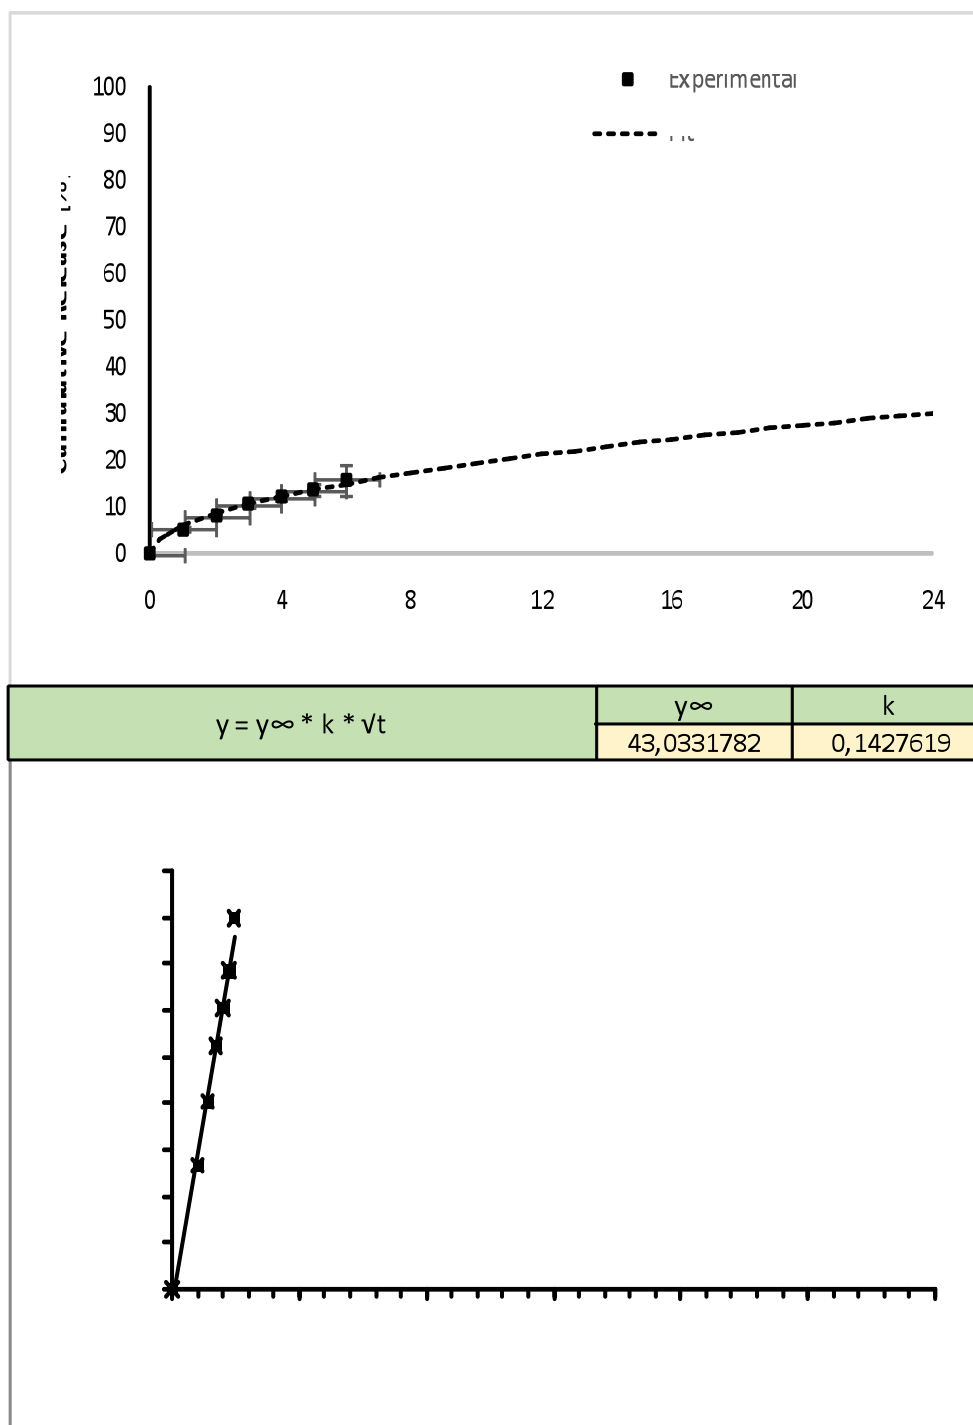

**Figure S26.** 3 % w/v  $\kappa$ -C:gelatin (1:1 mass ratio) hydrogels . Higuchi model at pH 6.8.

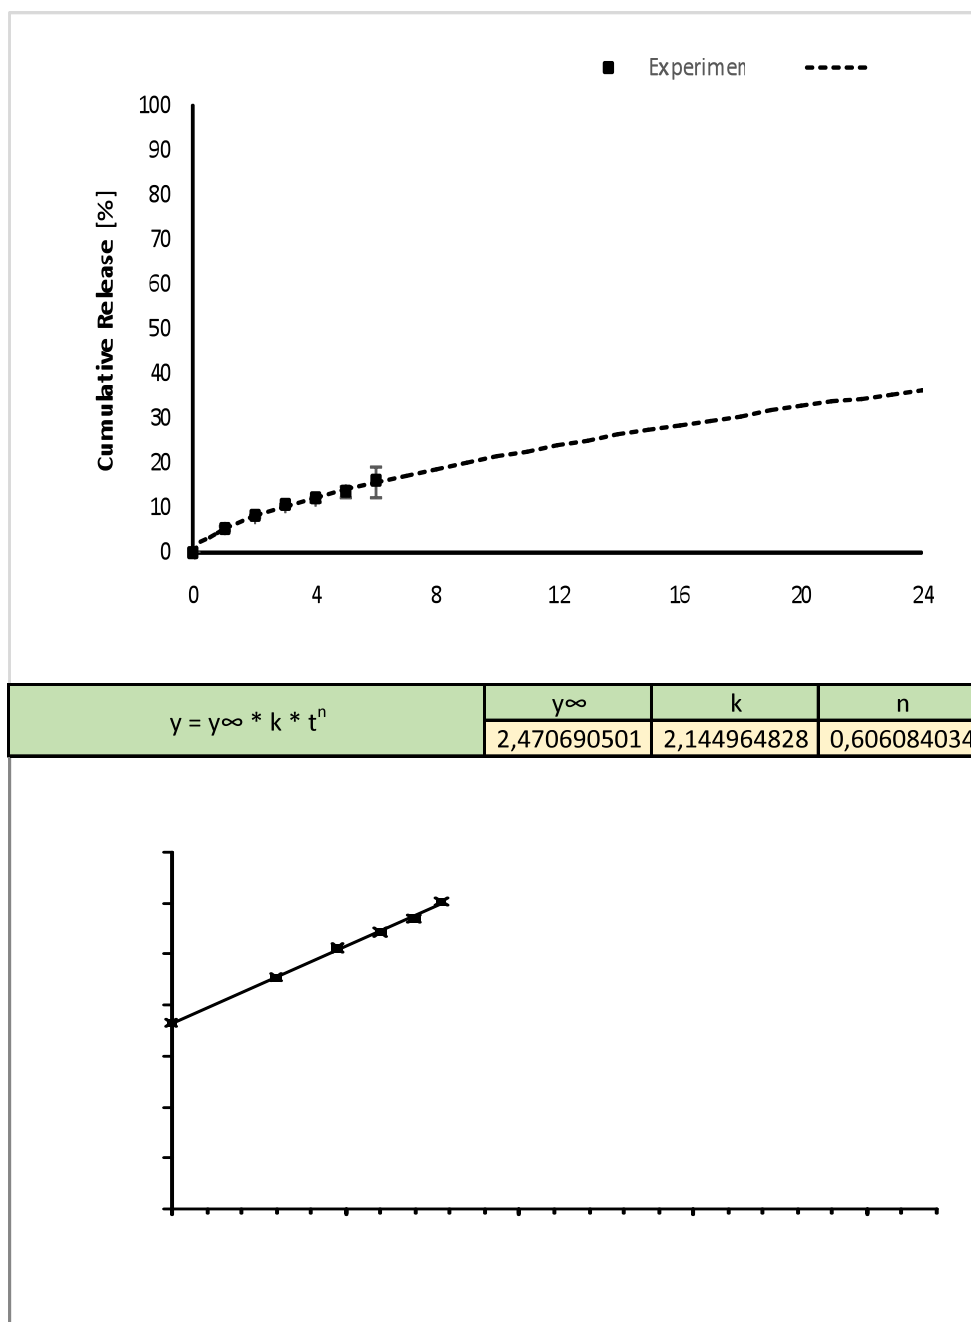

**Figure S27.** 3 % w/v  $\kappa$ -C:gelatin (1:1 mass ratio) hydrogels . Korsmeyer-Peppas model at pH 6.8.

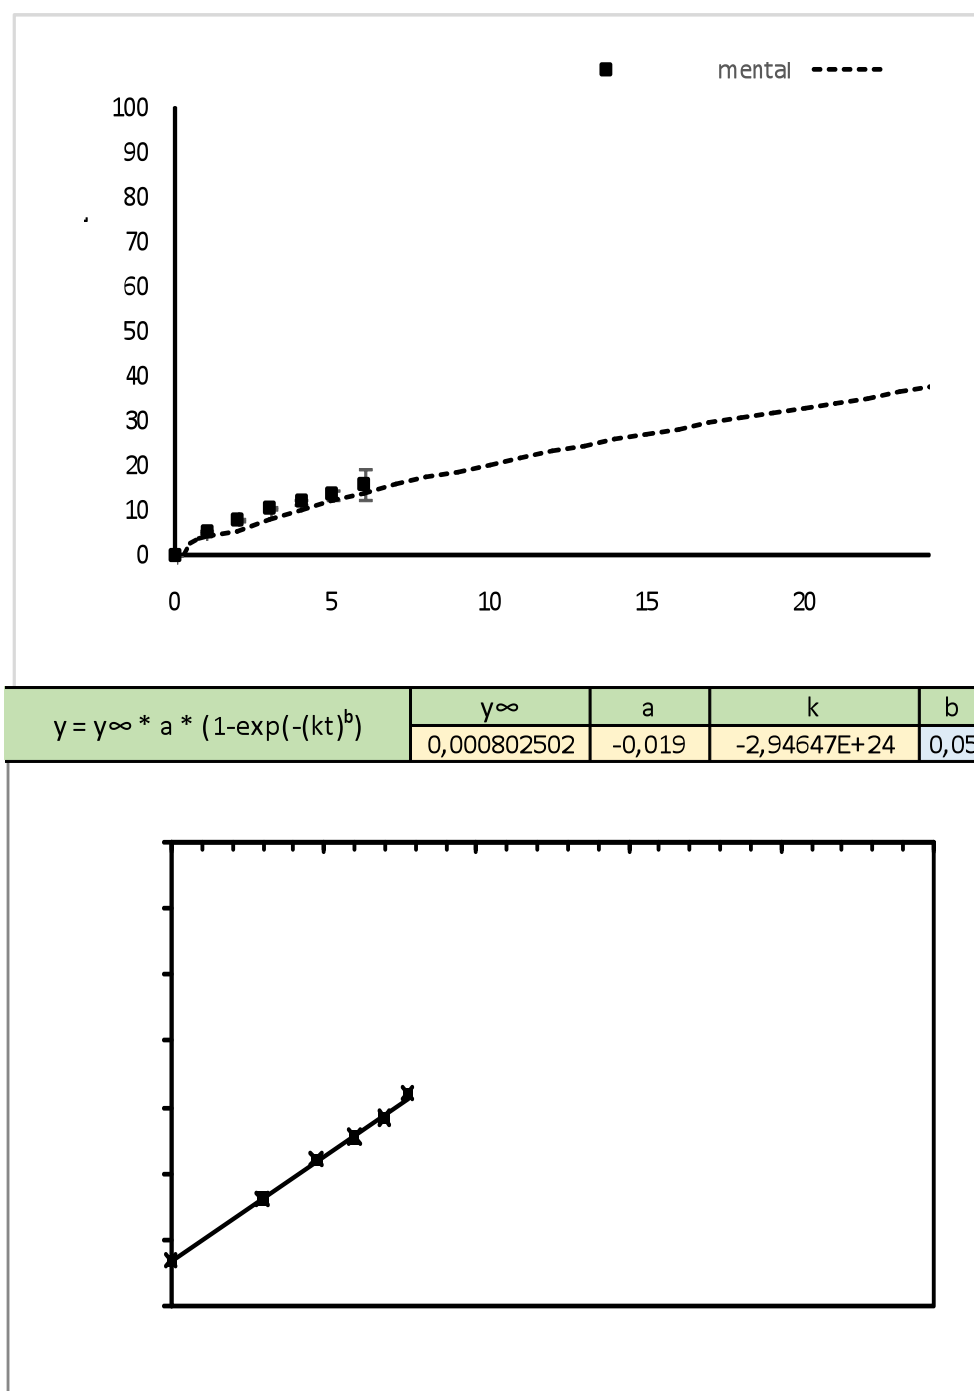

**Figure S28.** 3 % w/v  $\kappa$ -C:gelatin (1:1 mass ratio) hydrogels . Weibull model at pH 6.8.

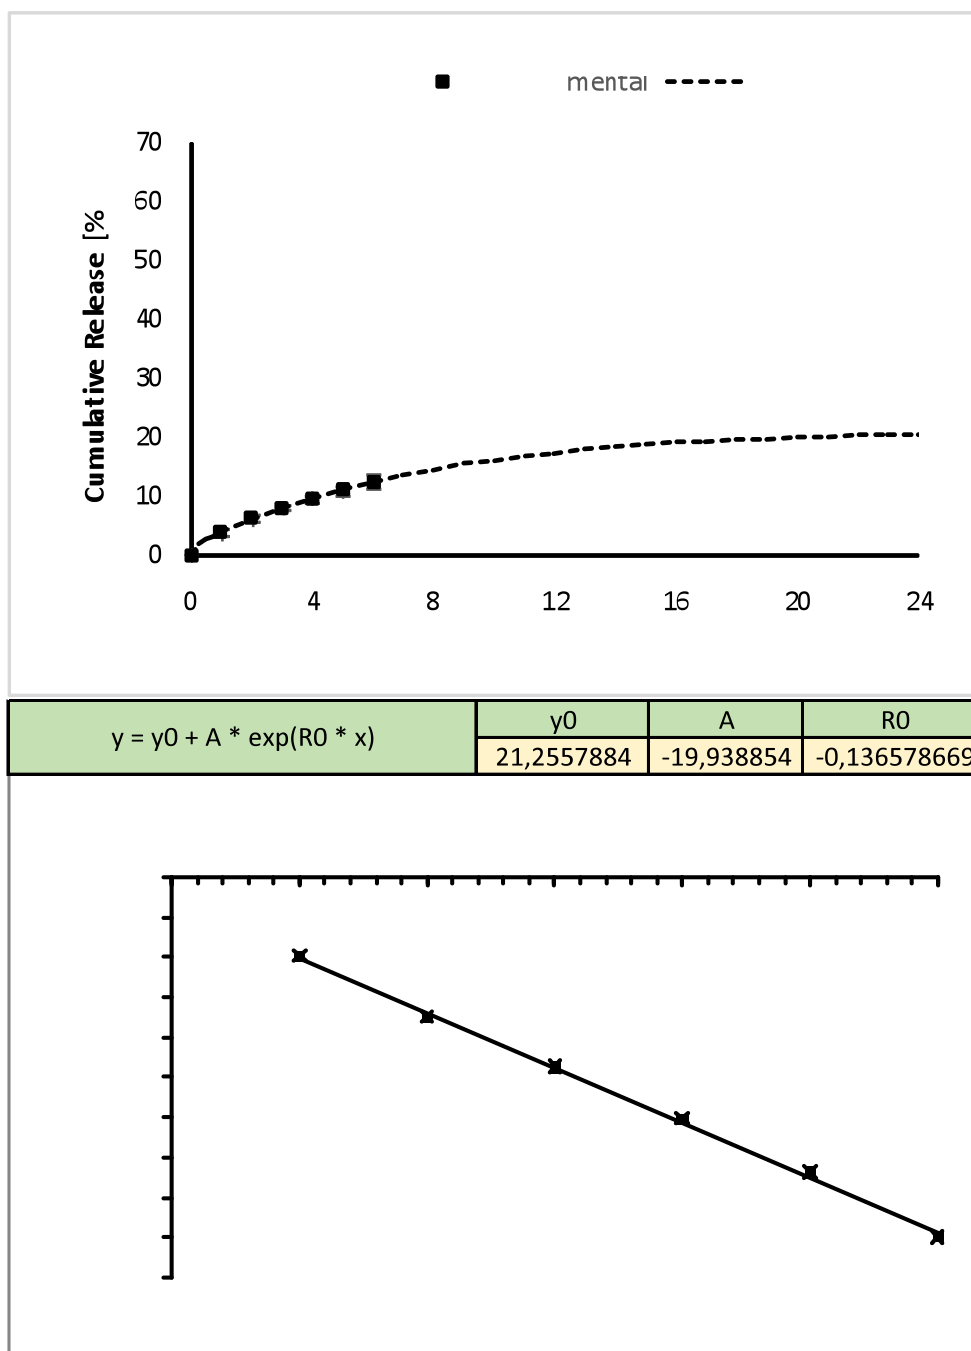

**Figure S29.** 4 % w/v  $\kappa$ -C:gelatin (1:1 mass ratio) hydrogels. First order kinetic model at pH 6.8.

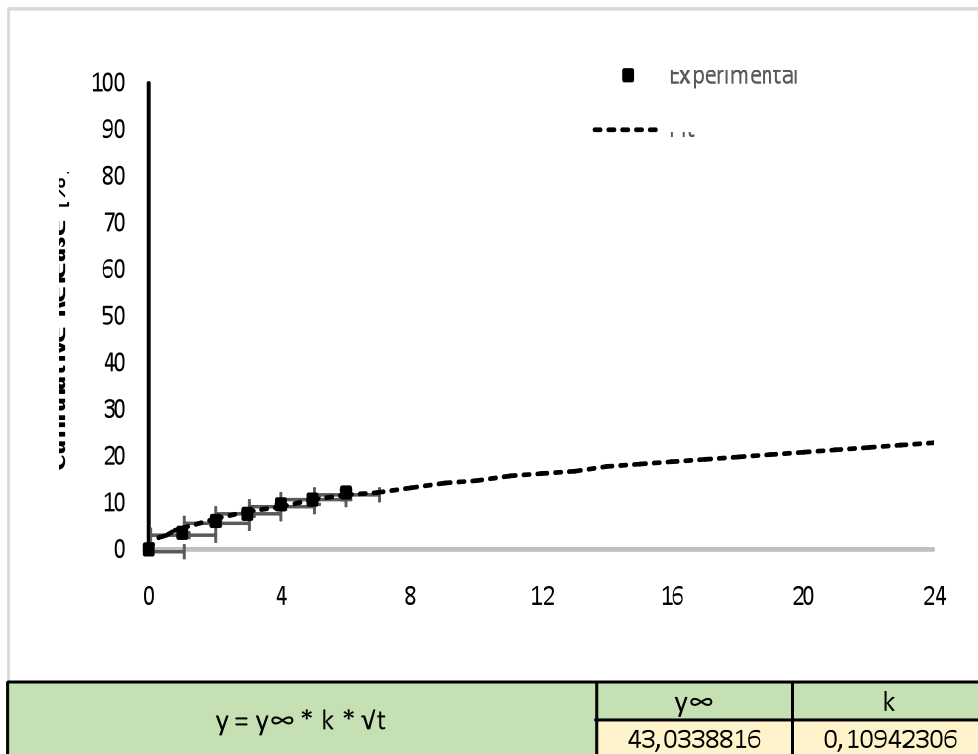

mean

$$y = 5,069x - 0,699$$

$$R^2 = 0,984$$

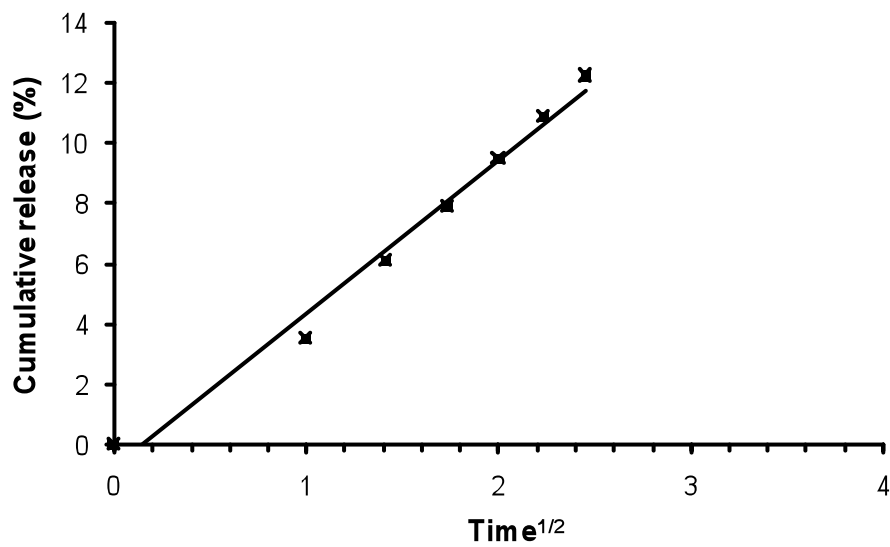

**Figure S30.** 4 % w/v  $\kappa$ -C:gelatin (1:1 mass ratio) hydrogels. Higuchi model at pH 6.8.

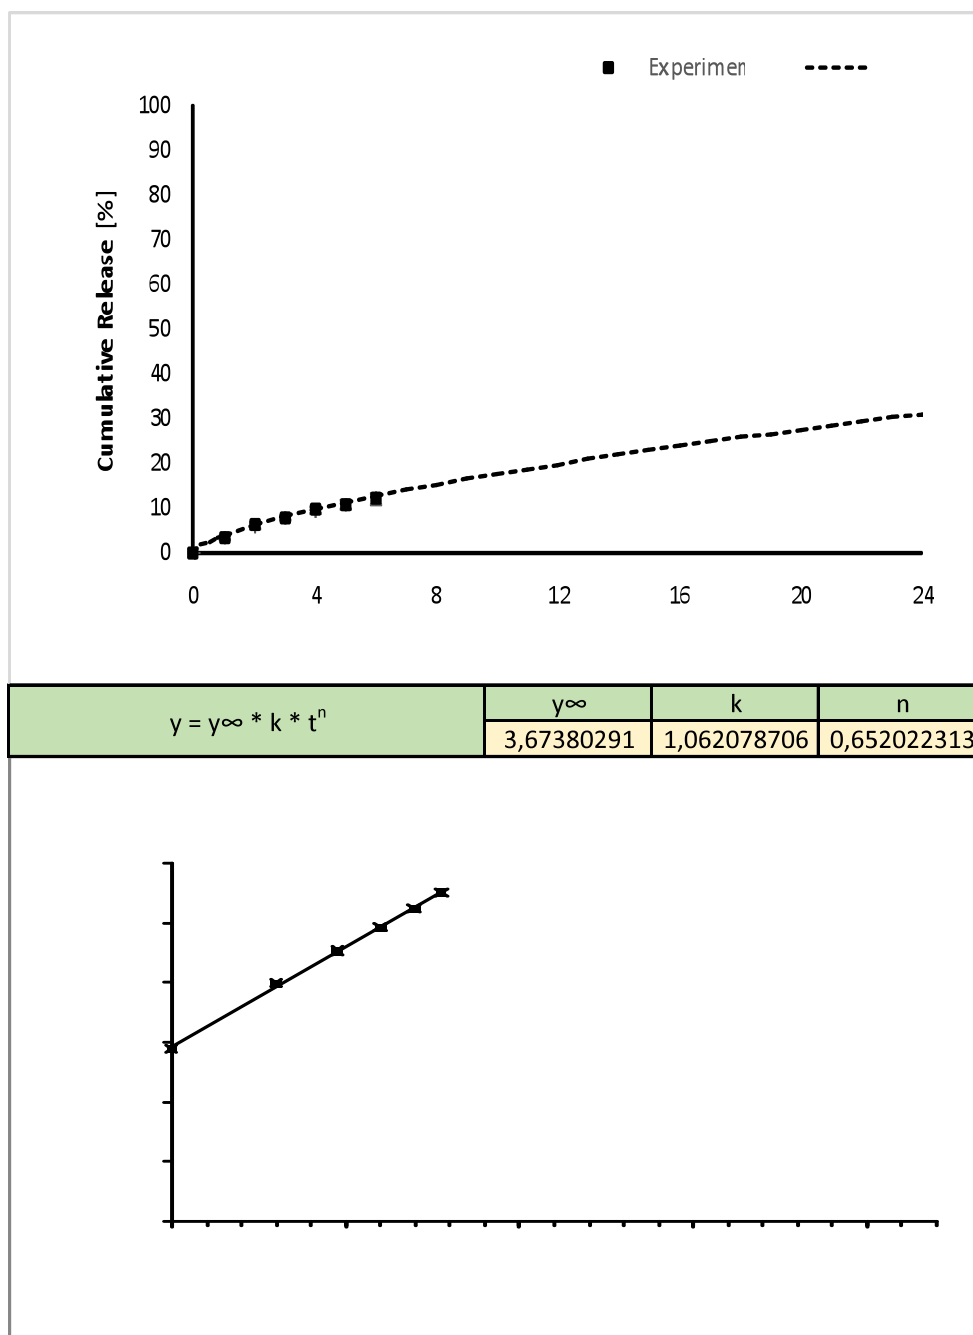

**Figure S31.** 4 % w/v  $\kappa$ -C:gelatin (1:1 mass ratio) hydrogels. Korsmeyer-Peppas model at pH 6.8.



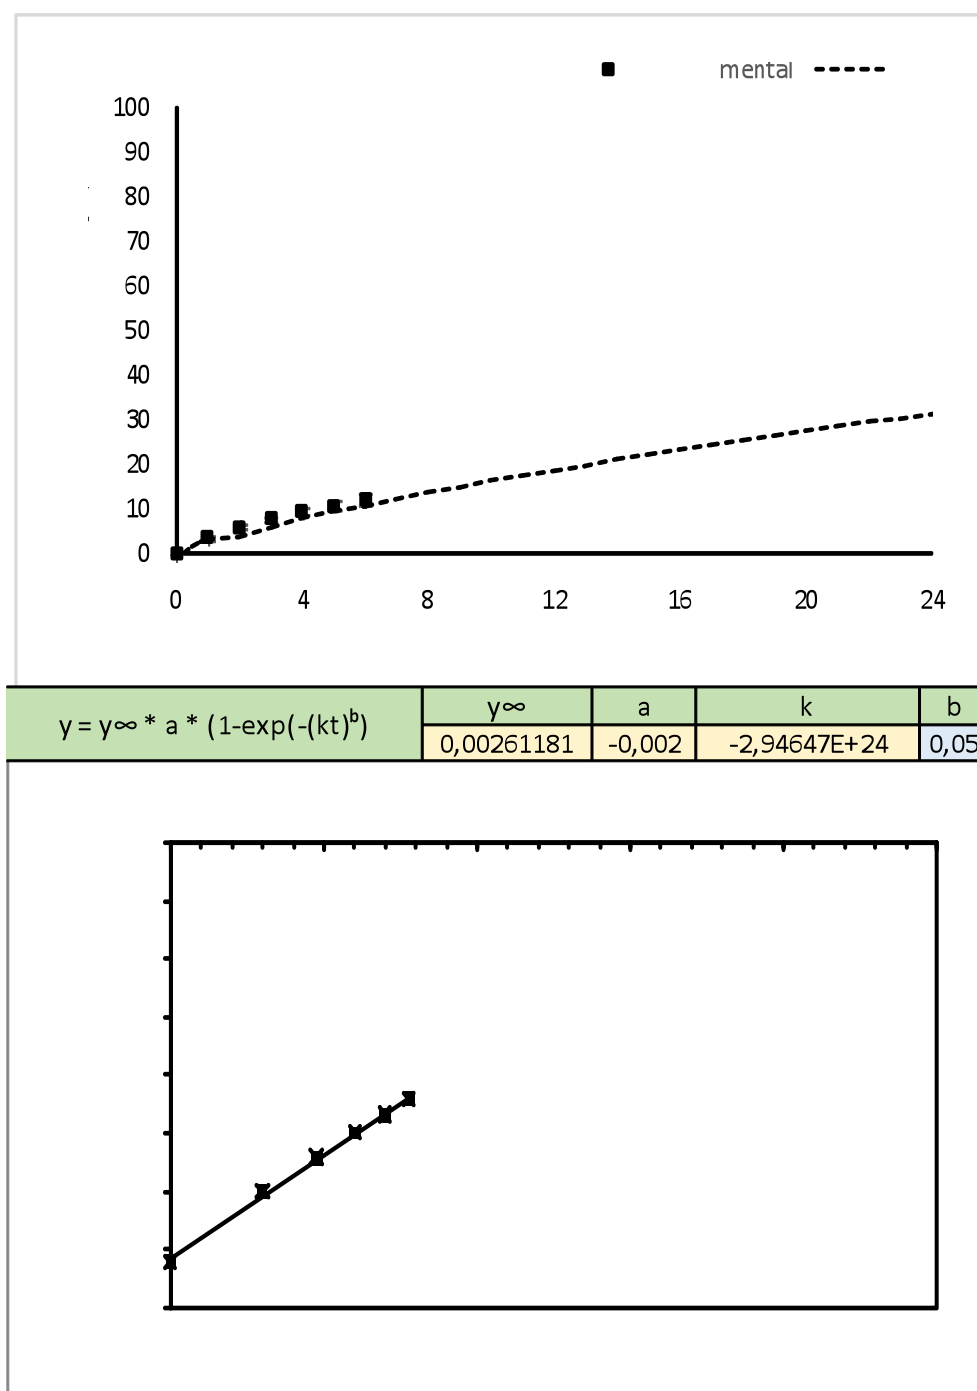

**Figure S32.** 4 % w/v  $\kappa$ -C:gelatin (1:1 mass ratio) hydrogels. Weibull model at pH 6.8.

## 6. Photoisomerization experiments

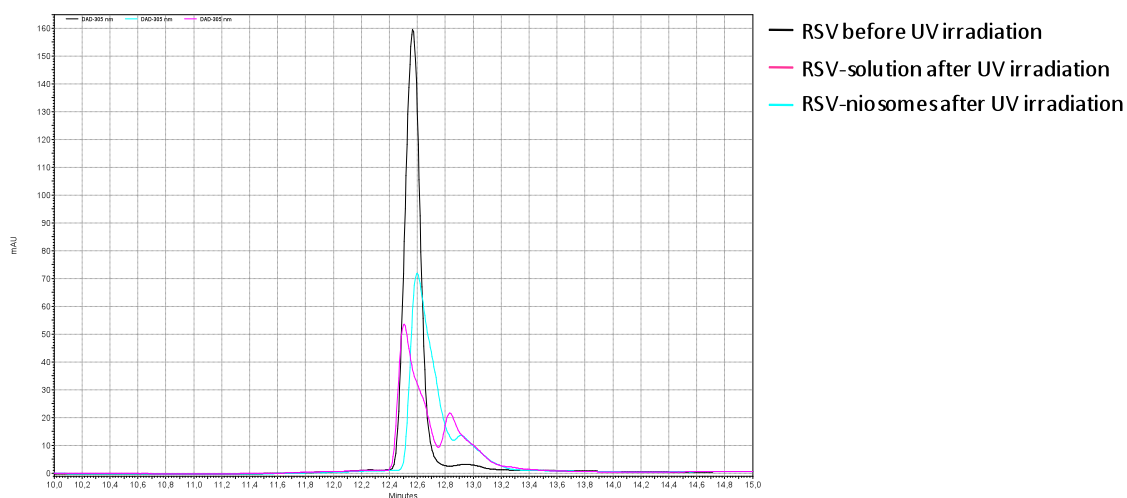

**Figure S33.** Chromatograms of RSV before (black line) and after UV irradiation (pink and light blue lines for RSV ethanolic control solution and RSV in niosomes, respectively).

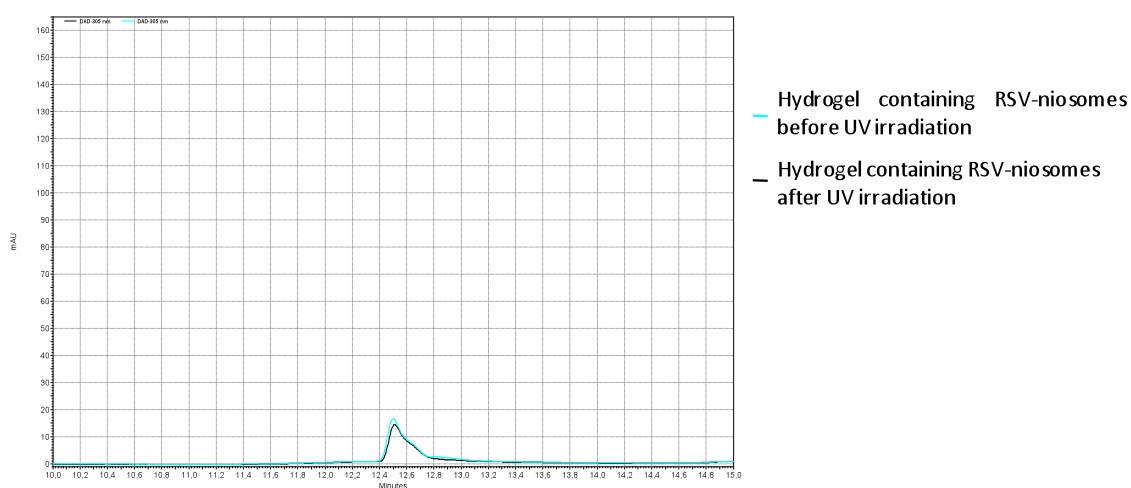

**Figure S34.** Chromatograms of RSV in niosomes encapsulated in hydrogel before and after UV-irradiation (light blue and black lines, respectively).

**Table S8.** Molar ratio of *trans*-RSV remaining in the sample after UV irradiation.

| Sample                      | <i>trans</i> -RSV remaining |
|-----------------------------|-----------------------------|
| Ethanolic control solution  | 0,26 ± 0,03                 |
| Niosomes                    | 0,70 ± 0,07                 |
| Niosomes entrapped hydrogel | 0,89 ± 0,03                 |
